# Supplementary material for: Waterlogging affects plant morphology and the expression of key genes in tef (Eragrostis tef)
Source: PubMed Central journal article supplement (PMC6508588; doi:10.1002/pld3.56), 2018-04-25
Supplement: PLD3-2-e00056-s008.pdf [file PLD3-2-e00056-s008.pdf]

## Authors response to reviewers and editors

### (Plant Direct)

**Reviewer #2:** The manuscript has been improved through the changes made to the earlier version. There are still a few minor things that need attention

| Reviewer comments                                                                                                                                                                                                                                  | Authors response                    |
|----------------------------------------------------------------------------------------------------------------------------------------------------------------------------------------------------------------------------------------------------|-------------------------------------|
| Figure 1 it is a little hard to see the difference between the control and waterlogged - maybe put these in different colours rather than black and grey so they stand out a little more - at least for the on-line version if not the print copy? | Figure 1 is now available in colour |
| Pg10 and elsewhere should htseq be HTSeq throughout?                                                                                                                                                                                               | corrected                           |
| P25-26, table 5 - tubby is usually in capitals ie., TUBBY, TUBBY-like                                                                                                                                                                              | done                                |
| Pg 26 KN1 should be spelt out as Knotted 1, Naphthylacetic acid not Napothylacetic acid                                                                                                                                                            | done                                |
| Pg 33 In the footnote 6 should be a superscript at the bottom                                                                                                                                                                                      | done                                |
| Conesa & Gotz (2008) on pg 17 is missing from the references                                                                                                                                                                                       | Included in the reference list      |
| Pg 35 <i>Zea nicaraguensis</i> in italics                                                                                                                                                                                                          | done                                |
| Pg 36 in Fukao et al -- ...submergence tolerance in rice.. delete the '(W)'; Hsu et al 2011 - - page number (e28888) missing?                                                                                                                      | corrected                           |
| Pg37 Juntawong et al 2014 - page number (658) missing; Kadam et al - page number (862) missing; Kawahara et al - page number (4) missing; Kayum et al - page number (23) missing; Lee et al 2011 <i>Arabidopsis thaliana</i> in italics            | done                                |
| Pg 38 malik et al <i>Hordeum marinum</i> and <i>triticum aestivum</i> in italics; Miro et al <i>Oryza sativa</i> in italics; Reddy et al - no page number;                                                                                         | done                                |
| Pg 39 Sampedro & Cosgrove - no page numbers; Tatusov et al - no page numbers; Thirunavukkarasu et al - no page numbers; Tsuchiya et al - no page numbers; Watanabe et al - no page numbers;                                                        | corrected                           |

### Editor comments

|                                                                                                                                                                                |           |
|--------------------------------------------------------------------------------------------------------------------------------------------------------------------------------|-----------|
| In addition to the minor edits indicated by the reviewer, please check the reference section for the italicization of the species names suggested by the reviewer previously.  | done      |
| When changing "HTSeq Count" (Instead of htseq) please note it also needs to be changed in the footnotes of the tables, in addition to the locations suggested by the reviewer. | corrected |
