# Supplementary material for: Waterlogging affects plant morphology and the expression of key genes in tef (Eragrostis tef)
Source: Plant Direct. 2018 Apr 25;2(4):e00056. doi: 10.1002/pld3.56 (PMC6508588; doi:10.1002/pld3.56)
Supplement: Supplementary file 1 [file PLD3-2-e00056-s001.pdf]

A Alba

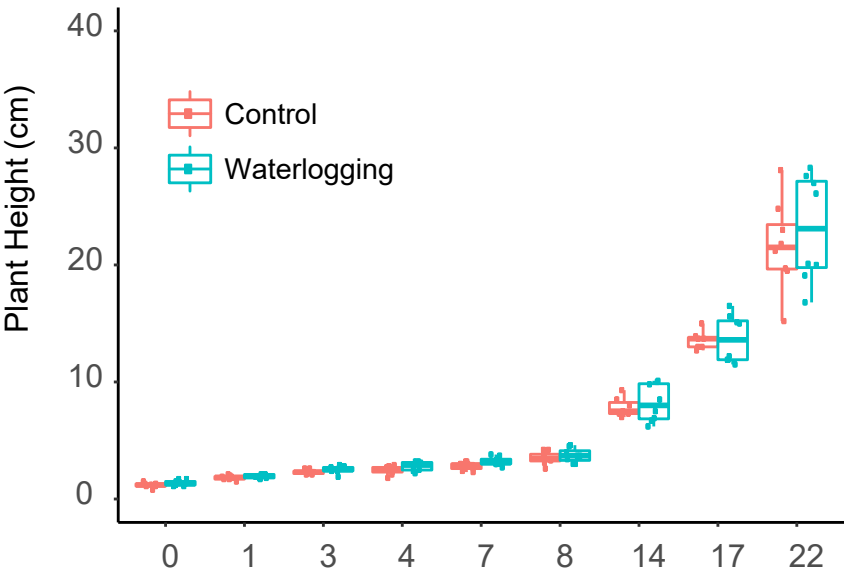

B Quncho

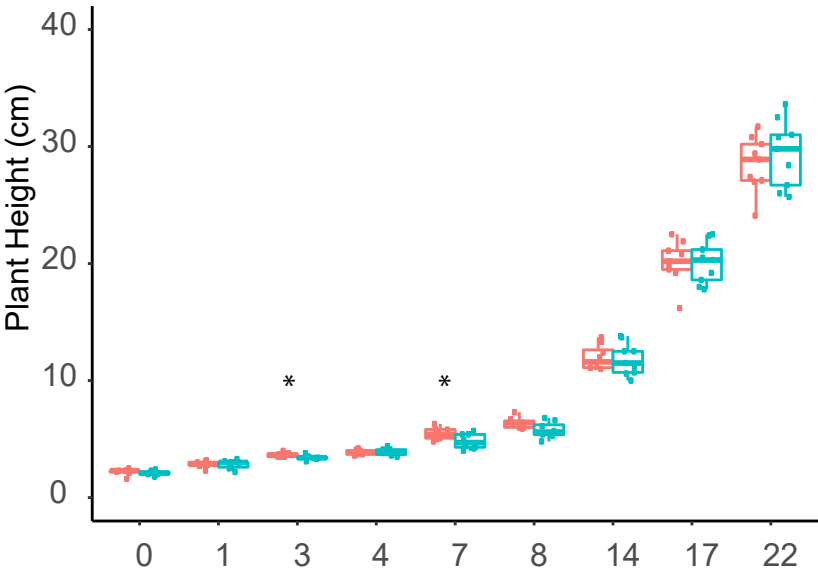

C Tsedey

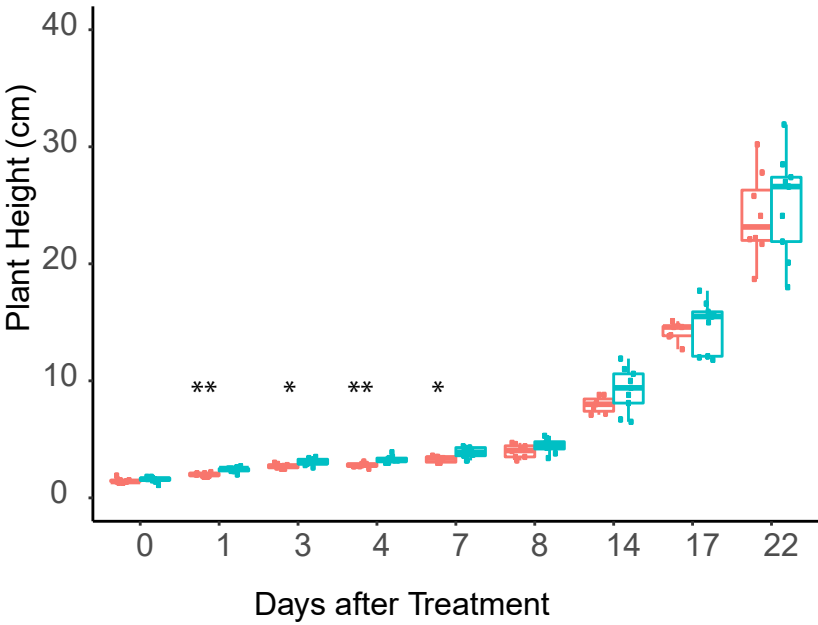

**Figure S1. Growth of four-day old seedlings of two tef genotypes, Quncho and Tsedey, subjected to waterlogging and normal watering for 22 days. Shoot dry weight (A), root dry weight (B), Shoot length (C), Root length (D) and the number of leaves were measured from 0 to 24 days after treatment. Means marked with an asterisk are significantly different from each other (Mann-Whitney: \*  $p \leq 0.05$ ).**

16 days after waterlogging  
Waterlogging

control

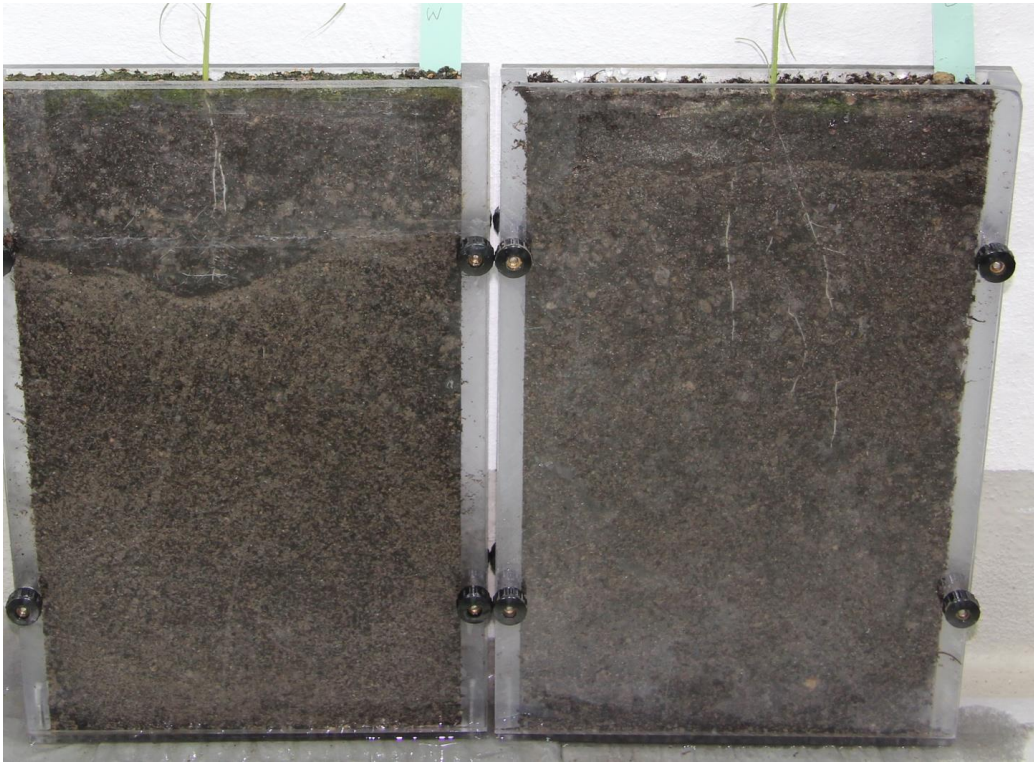

21 days after waterlogging  
Waterlogging

control

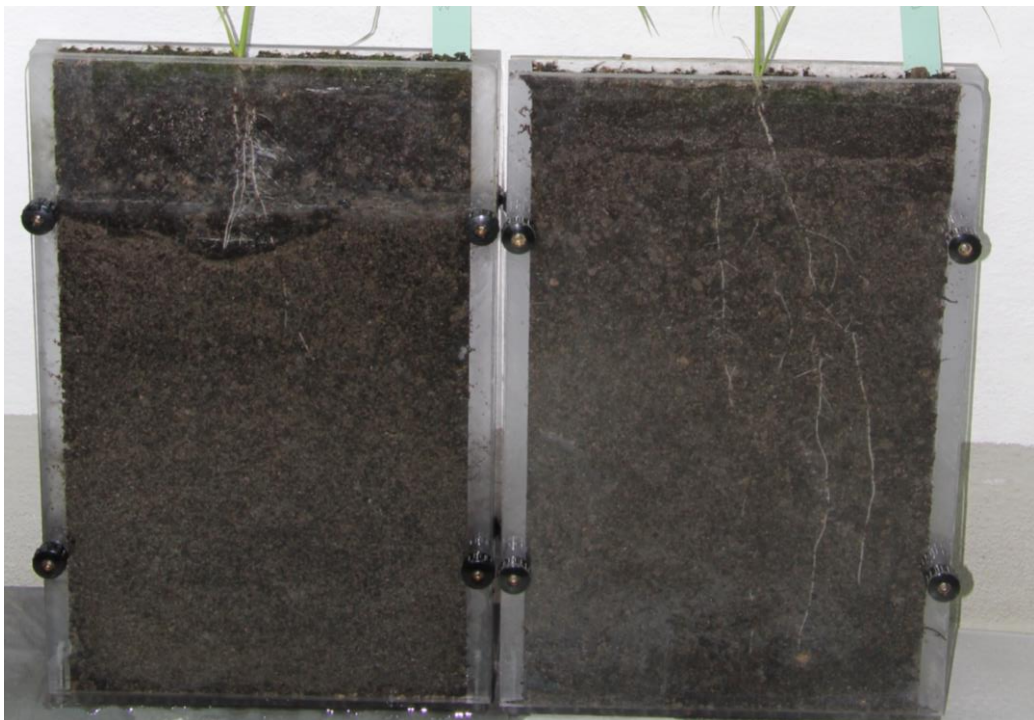

23 days after waterlogging  
Waterlogging

control

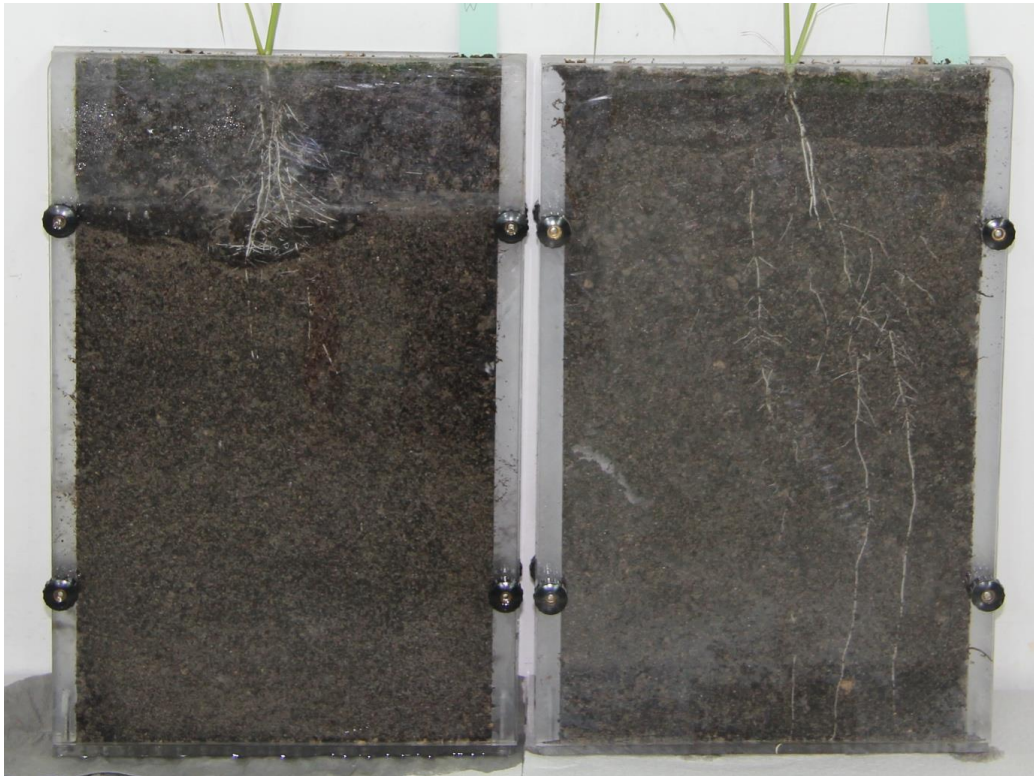

**Figure S2. Visualization of *Tsedey* roots using a rhizotron.** Visualization of waterlogged (left) and control (right) *Tsedey* roots at from 16, 21 and 23 days after waterlogging 4 day-old seedlings.

1 day after waterlogging  
Wheat waterlogging

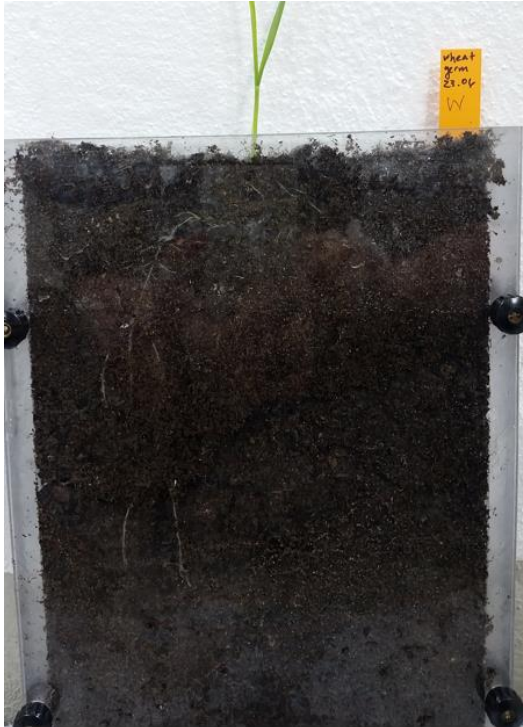

Wheat control

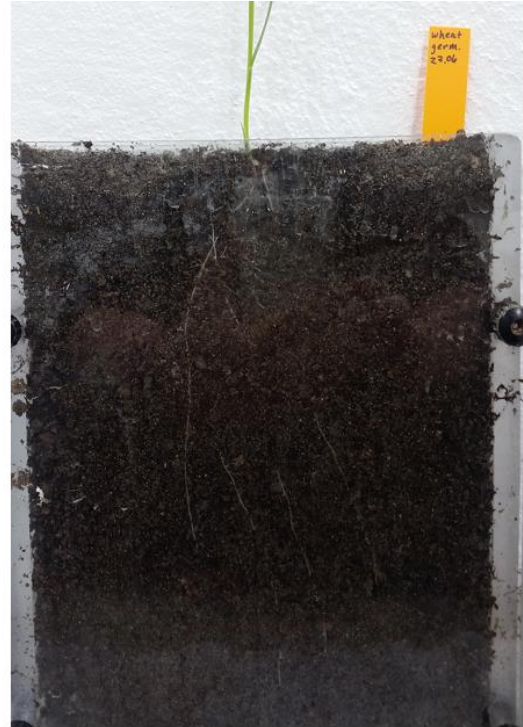

3 days after waterlogging  
Wheat waterlogging

Wheat control

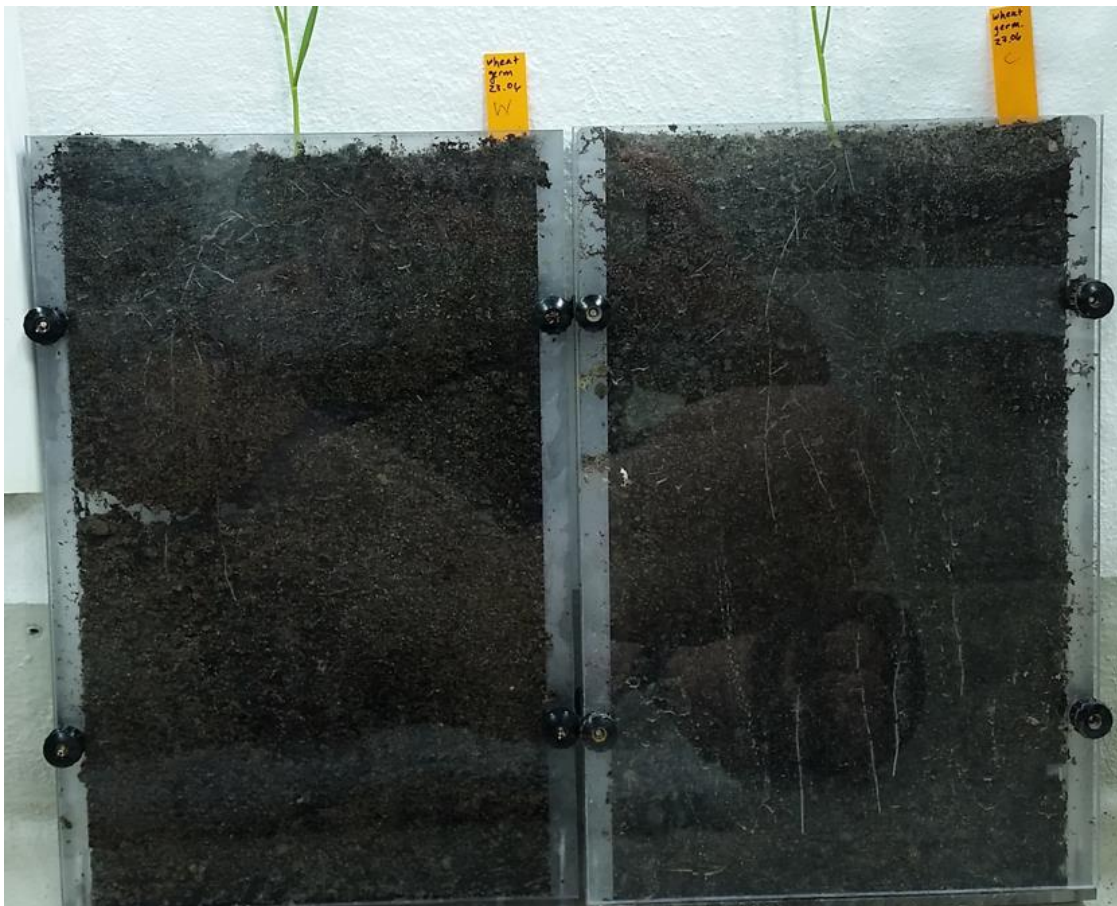

7 days after waterlogging

Wheat waterlogging

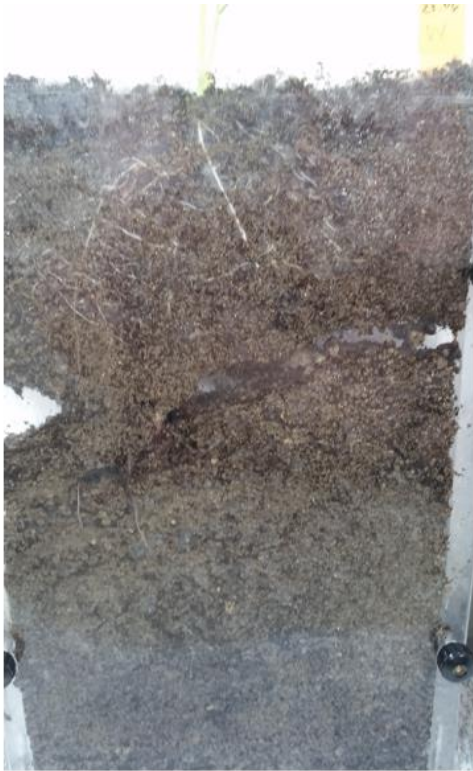

Wheat control

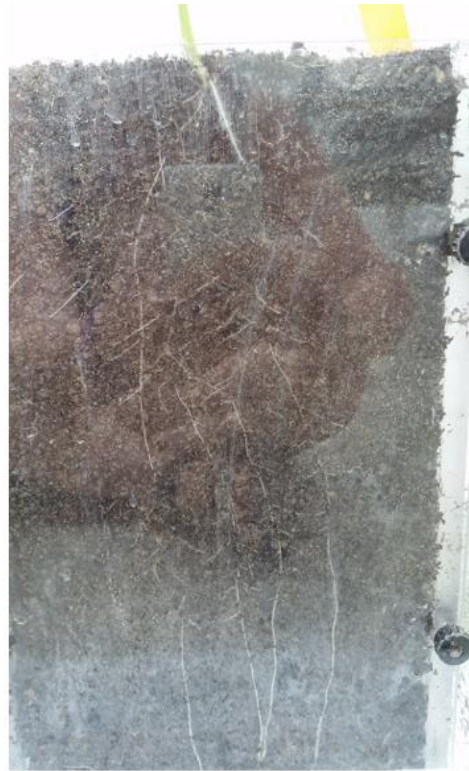

16 days after waterlogging

Wheat waterlogging

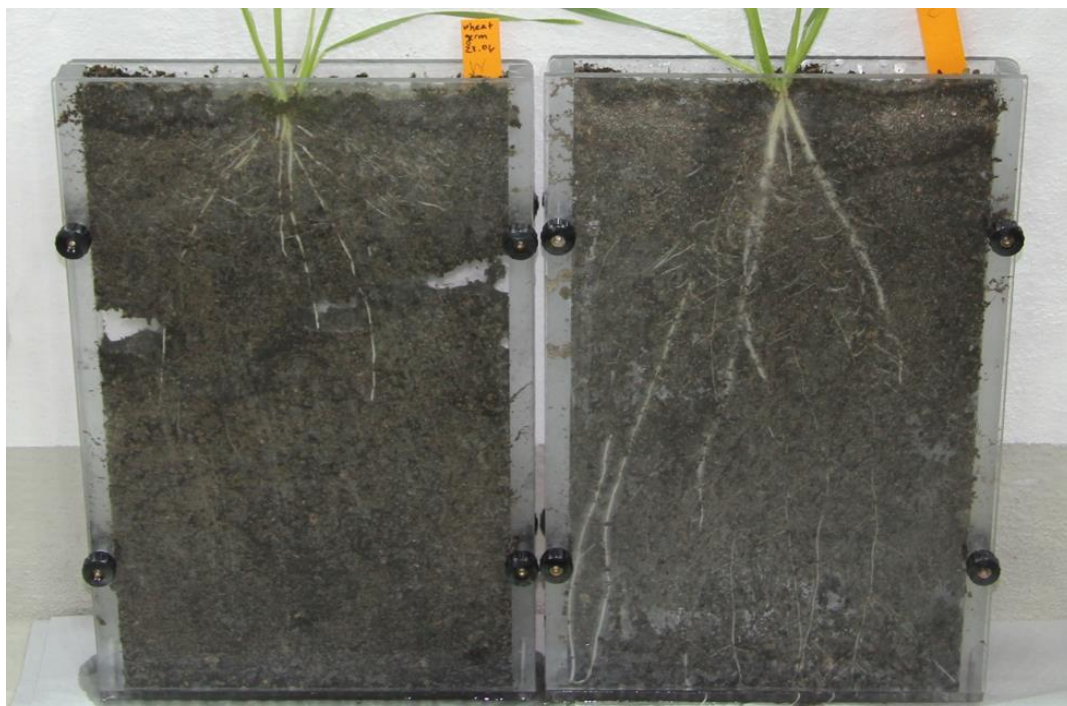

Wheat control

25 days after waterlogging  
Wheat waterlogging

Wheat control

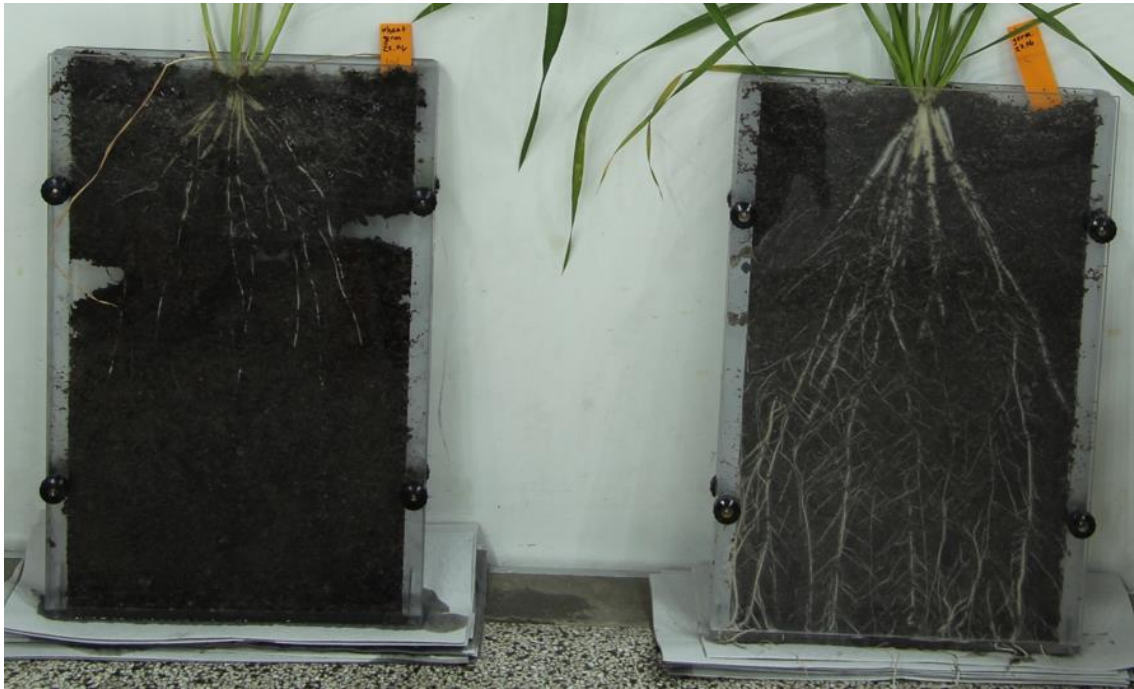

32 days after waterlogging  
Wheat waterlogging

Wheat control

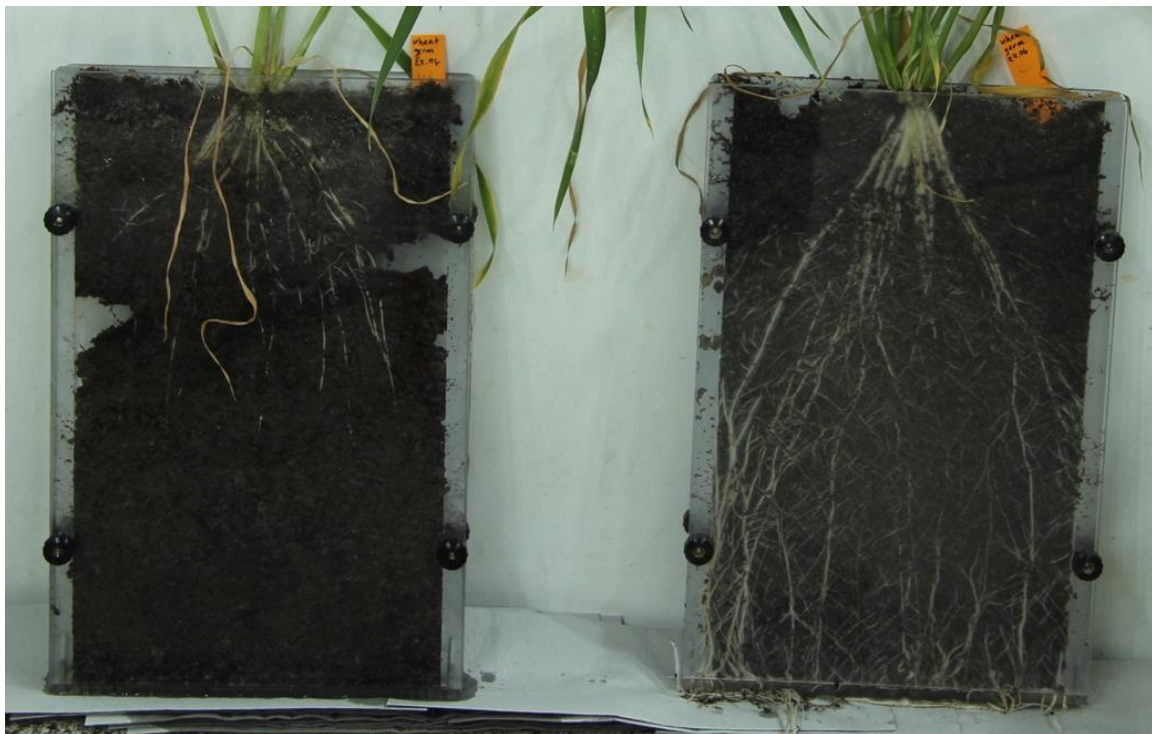

**Figure S3. Visualization of Wheat roots using a rhizotron.** Visualization of wheat roots at 1, 3, 7, 8, 16, 25 and 32 days after waterlogging 7 day-old seedlings.

1 day after waterlogging

Maize waterlogging

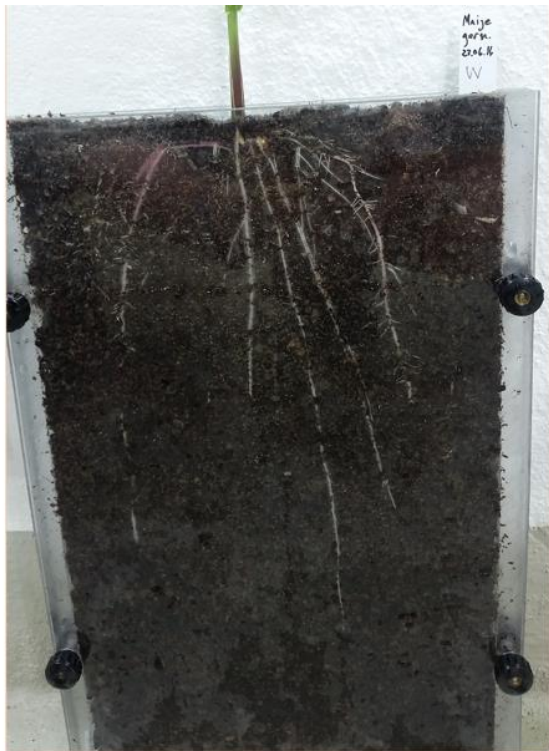

Maize control

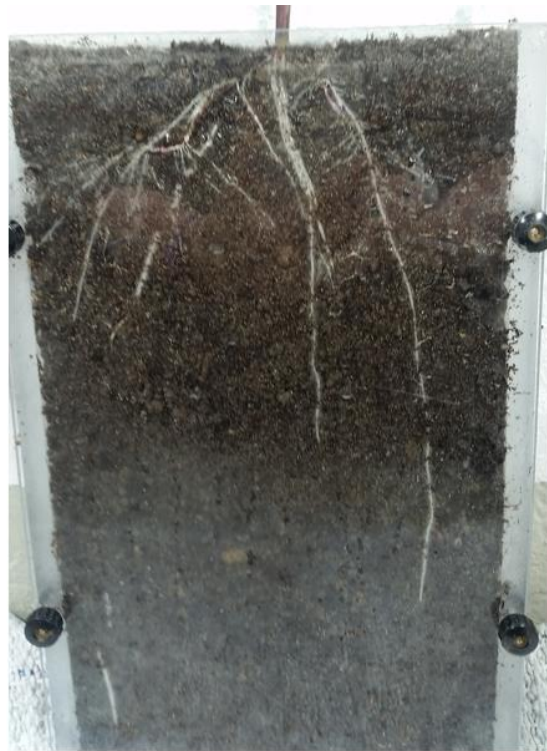

3 days after waterlogging

Maize waterlogging

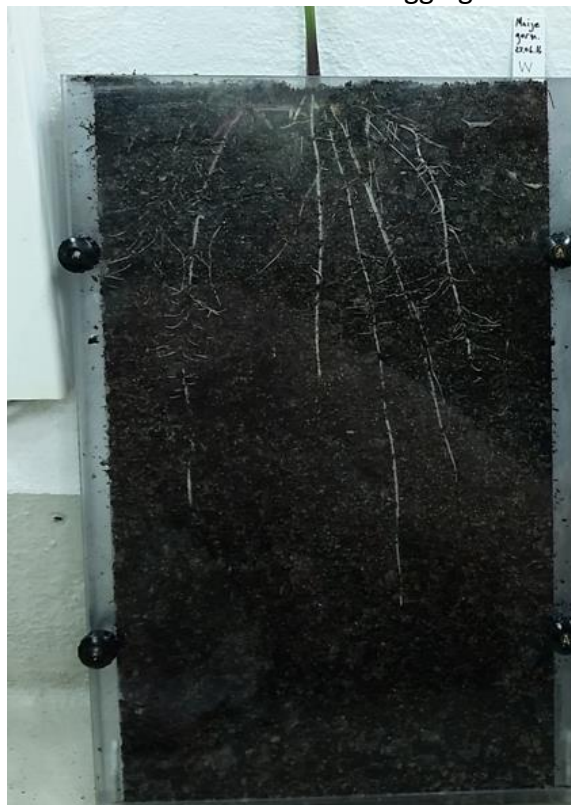

Maize control

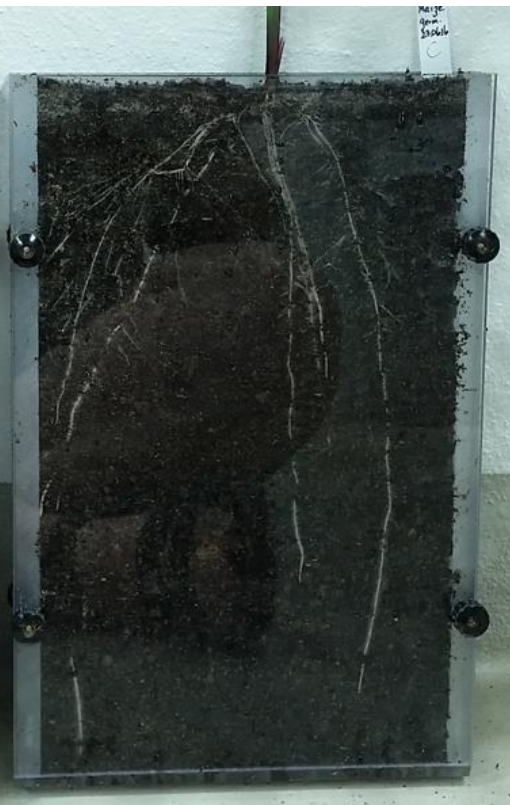

7 days after waterlogging

Maize waterlogging

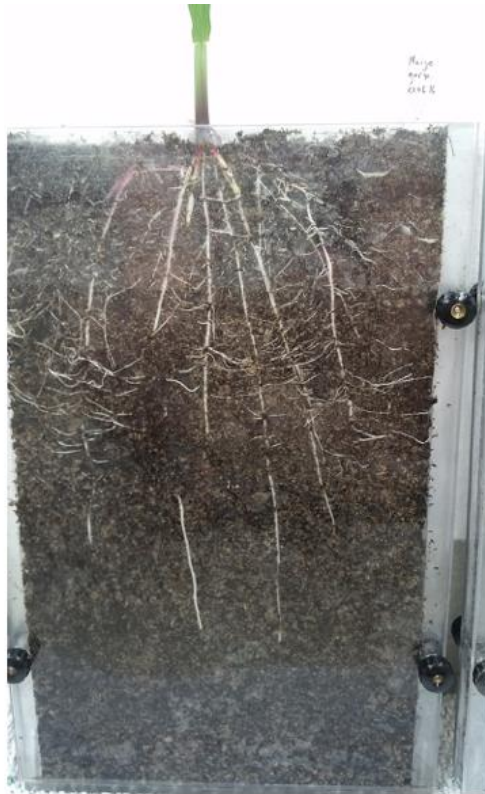

Maize control

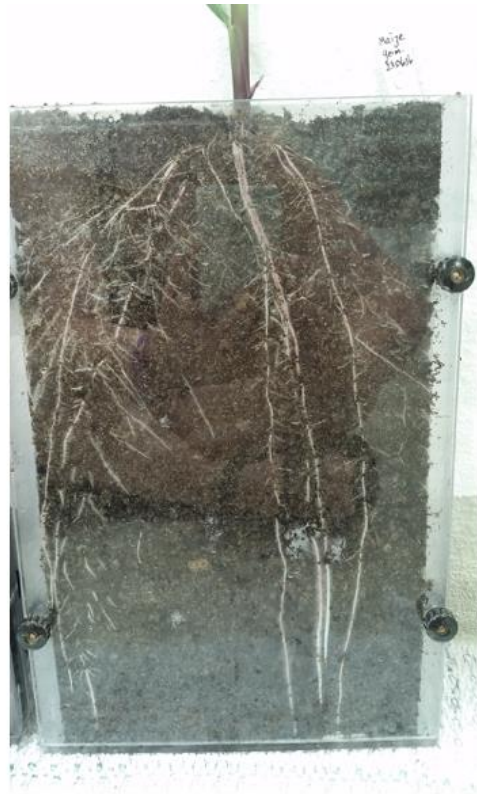

10 days after waterlogging

Maize waterlogging

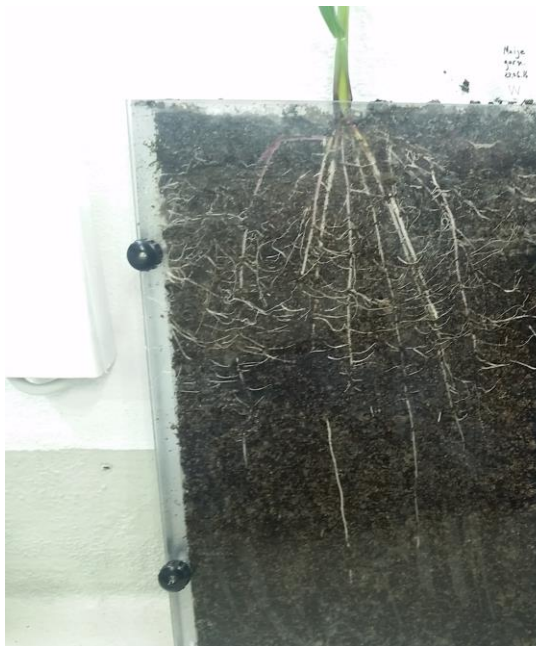

Maize control

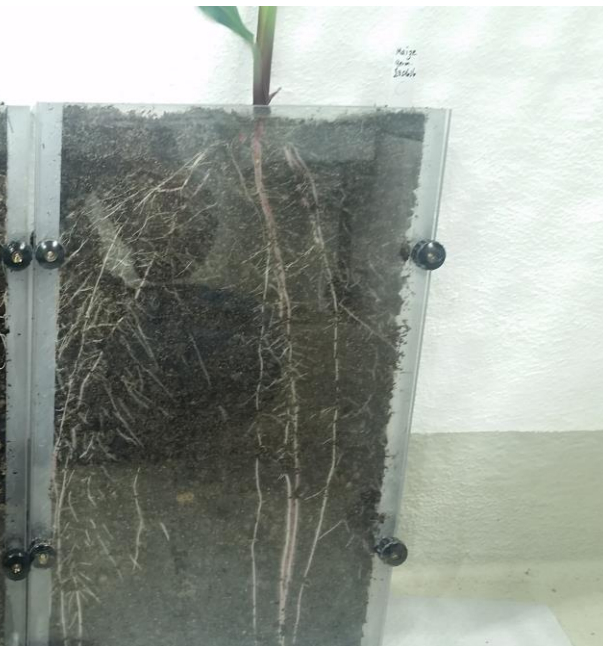

18 days after waterlogging  
Maize waterlogging

Maize control

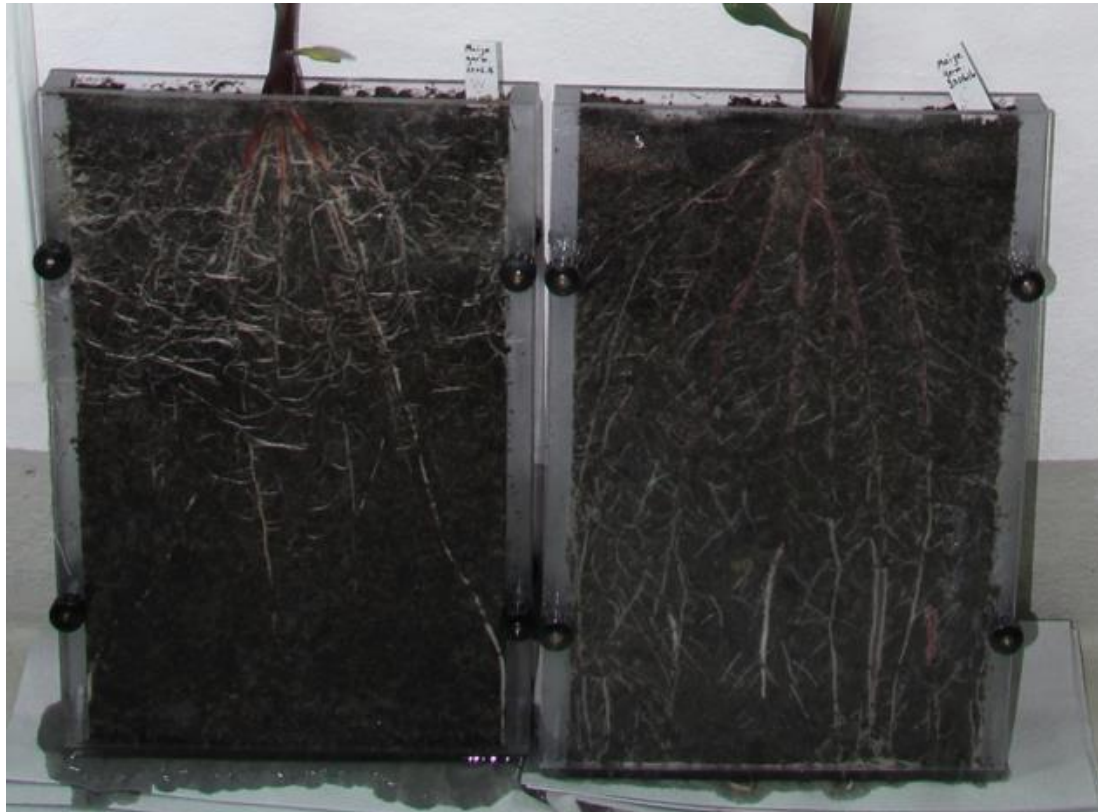

25 days after waterlogging  
Maize waterlogging

Maize control

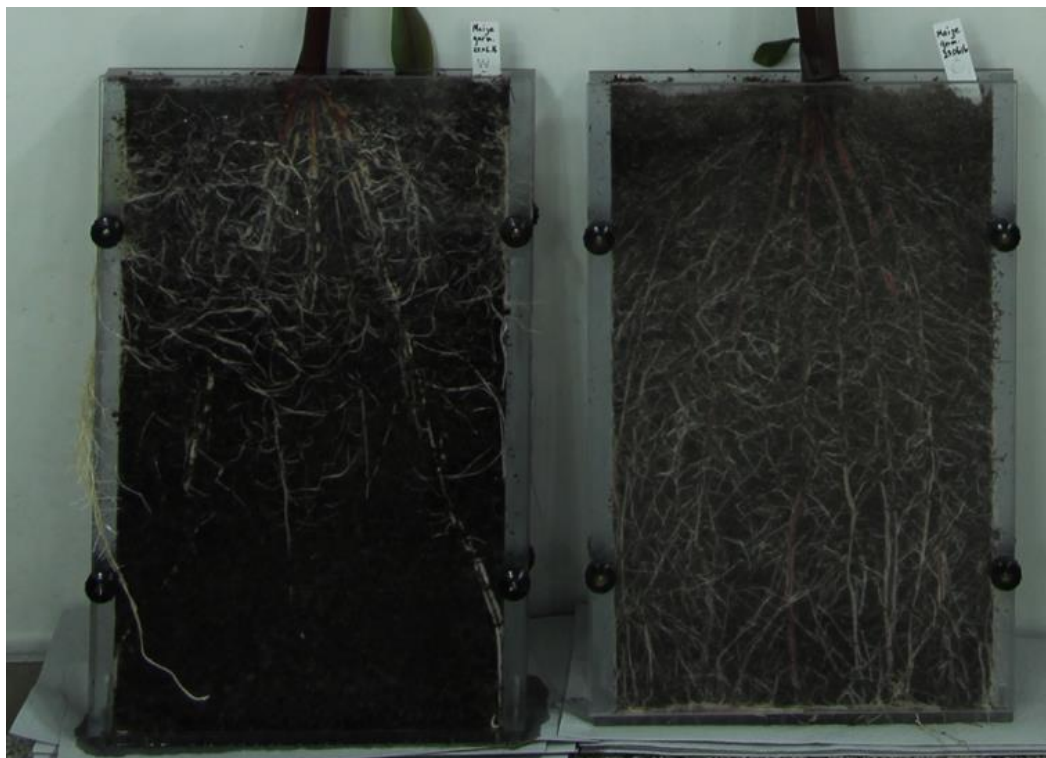

**Figure S4. Visualization of Maize roots using a rhizotron.** Visualization of maize roots at 1, 3, 7, 10, 18, 21, 25 and 32 days after waterlogging 7 day-old seedlings.

|                                                                                                            |                                                                                                       |                                                                                                      |                                                                                                       |                                                                                                       |                                                                                                       |
|------------------------------------------------------------------------------------------------------------|-------------------------------------------------------------------------------------------------------|------------------------------------------------------------------------------------------------------|-------------------------------------------------------------------------------------------------------|-------------------------------------------------------------------------------------------------------|-------------------------------------------------------------------------------------------------------|
| Alba control                                                                                               |                                                                                                       |                                                                                                      |                                                                                                       |                                                                                                       |                                                                                                       |
| A2_oben_1_10x<br>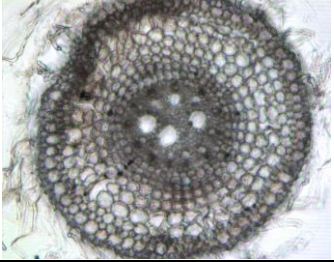          | A2_oben_2_10x<br>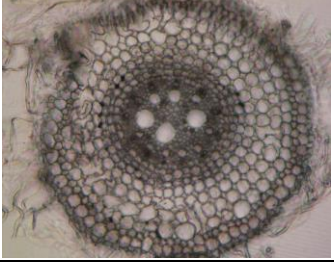    | A8_oben_1_10x<br>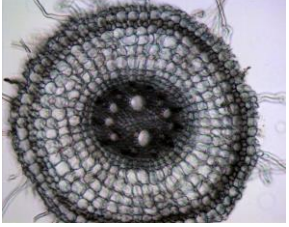  |                                                                                                       |                                                                                                       |                                                                                                       |
| A8_mitte_1_10x<br>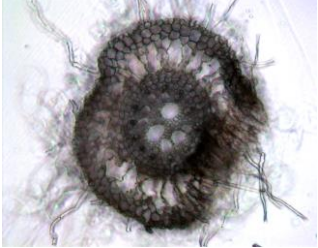         | A8_mitte_2_10x<br>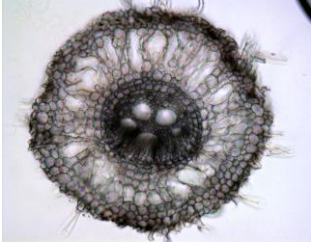   | A8_mitte_3_10x<br>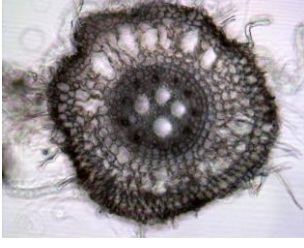 |                                                                                                       |                                                                                                       |                                                                                                       |
| Unten A1_unten_1_10x.<br>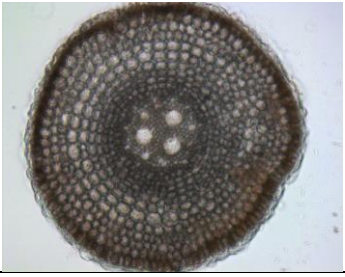 | A1_unten_2_10x<br>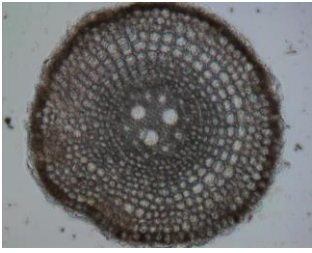   | A1_unten_2_10x<br>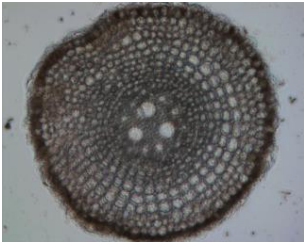 | A2_unten_1_10x<br>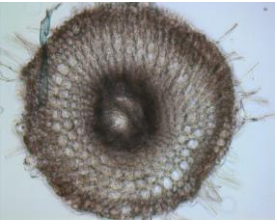 | A2_unten_2_10x<br>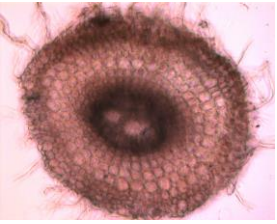 | A8_unten_1_10x<br>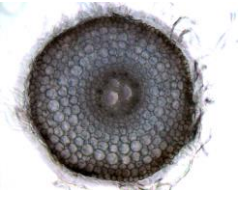 |
|                                                                                                            | A8_unten_2_10x<br>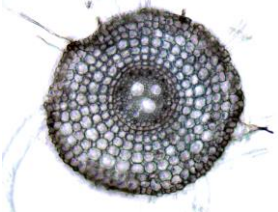 |                                                                                                      |                                                                                                       |                                                                                                       |                                                                                                       |

|                                                                                                             |                                                                                                        |                                                                                                        |                                                                                                         |                                                                                                         |                                                                                                         |
|-------------------------------------------------------------------------------------------------------------|--------------------------------------------------------------------------------------------------------|--------------------------------------------------------------------------------------------------------|---------------------------------------------------------------------------------------------------------|---------------------------------------------------------------------------------------------------------|---------------------------------------------------------------------------------------------------------|
| Alba Waterlogging                                                                                           |                                                                                                        |                                                                                                        |                                                                                                         |                                                                                                         |                                                                                                         |
| A13_oben_1_10x_200um<br>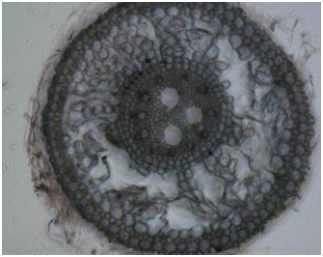    | A13_oben_1_10x<br>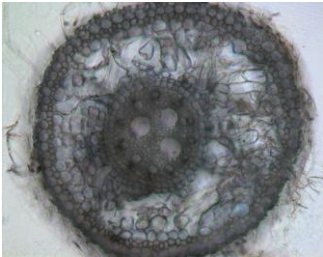    | A13_oben_1_10x<br>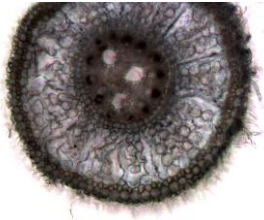   | A13_oben_2_10x<br>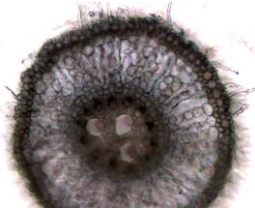   | A13_oben_3_10x<br>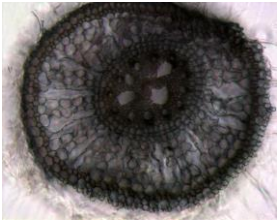   | A16_oben_1_10x<br>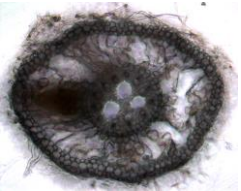   |
|                                                                                                             | A17_oben_1_10x<br>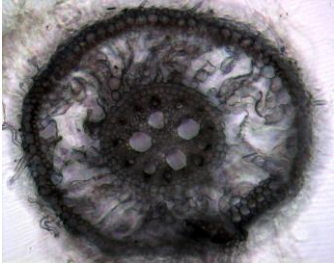    | A17_oben_2_10x<br>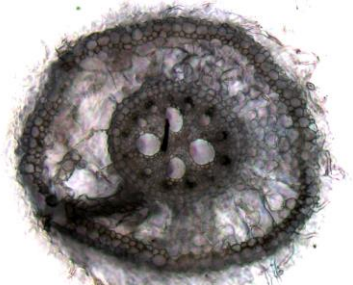   |                                                                                                         |                                                                                                         |                                                                                                         |
| Mitte A11_mitte_1_10x<br>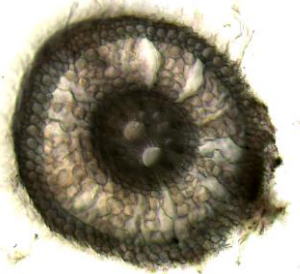 | A11_mitte_2_10x<br>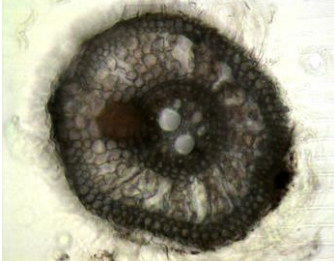  | A11_mitte_3_10x<br>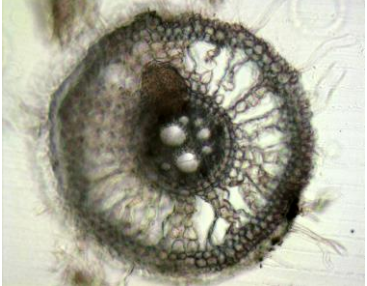 | A11_mitte_4_10x<br>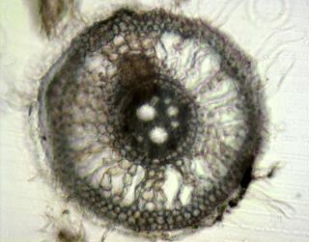 | A11_mitte_5_10x<br>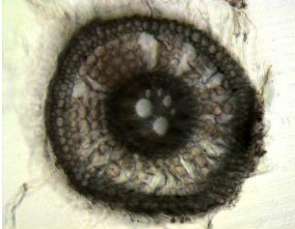 | A17_mitte_1_10x<br>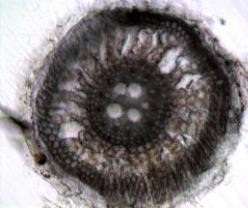 |
|                                                                                                             | A17_mitte_2_10x<br>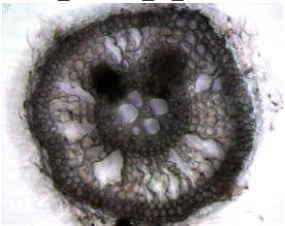 |                                                                                                        |                                                                                                         |                                                                                                         |                                                                                                         |
| Unten A13_unten_1_10x                                                                                       | A13_unten_2_10x                                                                                        | A11_unten_1_10x                                                                                        | A11_unten_2_10x                                                                                         | A11_unten_3_10x                                                                                         | A11_unten_4_10                                                                                          |

|                                                                                 |                                                                                                      |                                                                                   |                                                                                    |                                                                                    |                                                                                    |
|---------------------------------------------------------------------------------|------------------------------------------------------------------------------------------------------|-----------------------------------------------------------------------------------|------------------------------------------------------------------------------------|------------------------------------------------------------------------------------|------------------------------------------------------------------------------------|
| 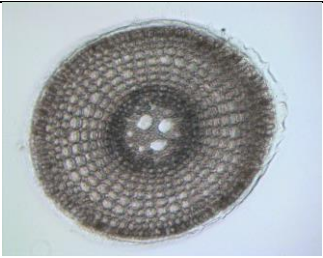 | 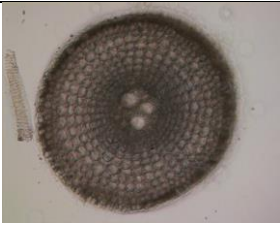                     | 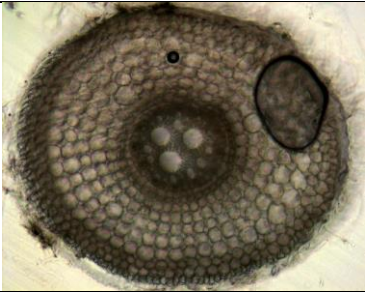 | 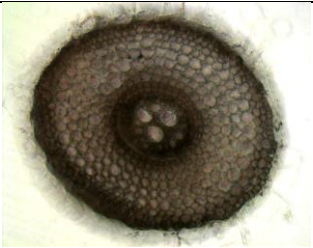 | 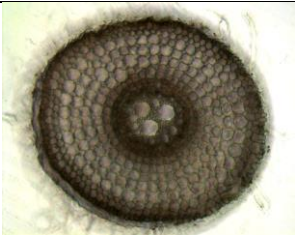 | 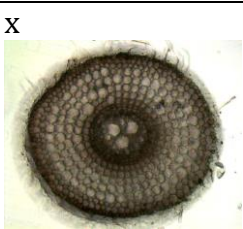 |
|                                                                                 | A17_unten_1_10x<br>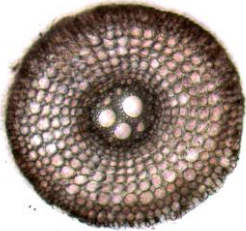 |                                                                                   |                                                                                    |                                                                                    |                                                                                    |

|                                                                                                            |                                                                                                                 |                                                                                                        |                                                                                                         |                                                                                                         |                                                                                                       |
|------------------------------------------------------------------------------------------------------------|-----------------------------------------------------------------------------------------------------------------|--------------------------------------------------------------------------------------------------------|---------------------------------------------------------------------------------------------------------|---------------------------------------------------------------------------------------------------------|-------------------------------------------------------------------------------------------------------|
| Quncho control                                                                                             |                                                                                                                 |                                                                                                        |                                                                                                         |                                                                                                         |                                                                                                       |
| Q1_oben_1_10x<br>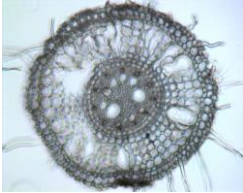          | Q2_oben_1_10x<br>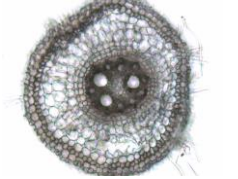              | Q2_oben_1_10x<br>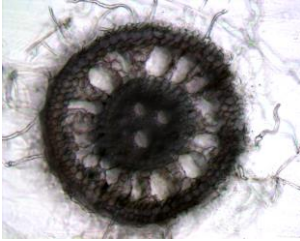    | Q2_oben_2_10x<br>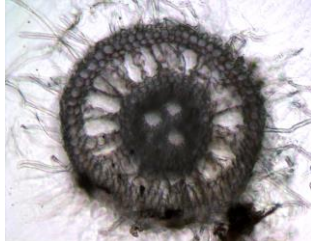    |                                                                                                         |                                                                                                       |
| Mitte Q1_mitte_1_10x<br>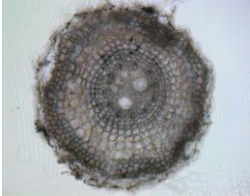   | Q2_mitte_1_10x<br>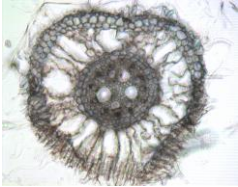             | Q9_mitte_1_10x<br>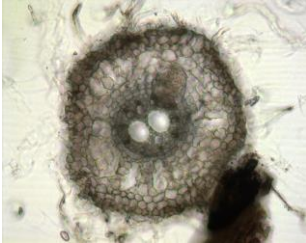   | Q9_mitte_2_10x<br>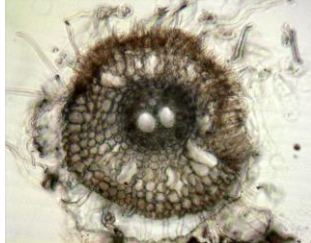   | Q9_mitte_3_10x<br>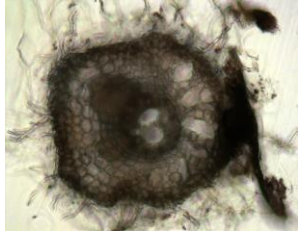   | Q9_mitte_4_10x<br>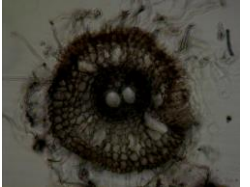 |
|                                                                                                            | Q9_mitte_5_10x<br>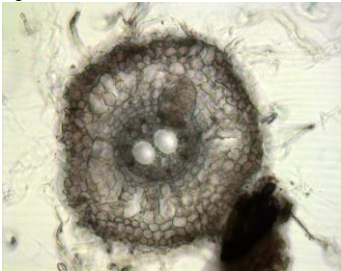            |                                                                                                        |                                                                                                         |                                                                                                         |                                                                                                       |
| Unten Q1_unten_1_10x<br>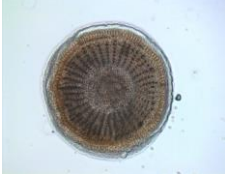 | Q2_unten_1_10x_150u<br>m<br>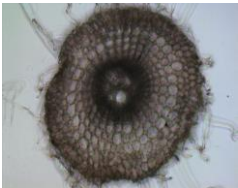 | Q2_unten_1_10x<br>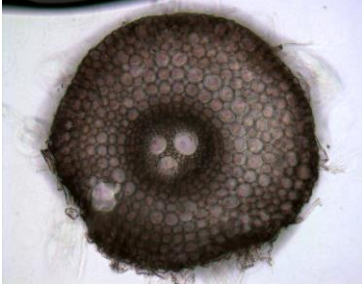 | Q2_unten_2_10x<br>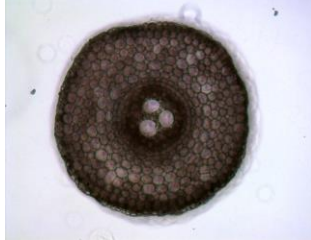 | Q2_unten_3_10x<br>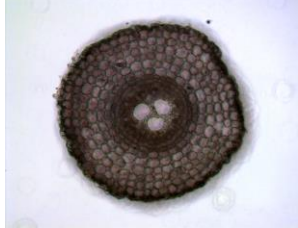 |                                                                                                       |

|                                                                                                           |                                                                                                      |                                                                                                        |                                                                                                        |                                                                                                        |                                                                                                        |
|-----------------------------------------------------------------------------------------------------------|------------------------------------------------------------------------------------------------------|--------------------------------------------------------------------------------------------------------|--------------------------------------------------------------------------------------------------------|--------------------------------------------------------------------------------------------------------|--------------------------------------------------------------------------------------------------------|
| Quncho Waterlogging                                                                                       |                                                                                                      |                                                                                                        |                                                                                                        |                                                                                                        |                                                                                                        |
| Oben Q12_oben_1_10x<br>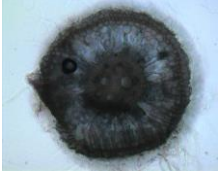   | Q14_oben_1_10x<br>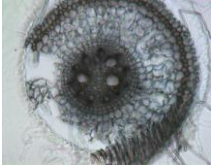  | Q12_oben_1_10x<br>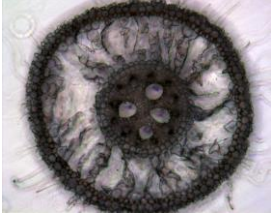   | Q12_oben_2_10x<br>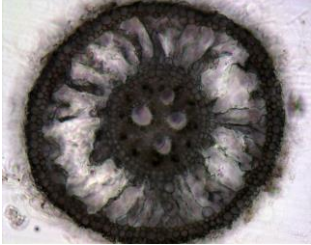  | Q12_oben_3_10x<br>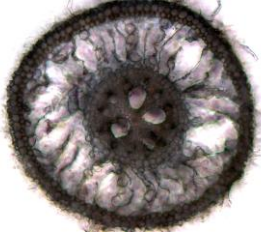  |                                                                                                        |
| Mitte Q12_mitte_1_10x<br>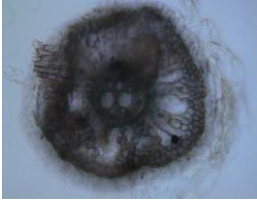 | Q12_mitte_1_10x<br>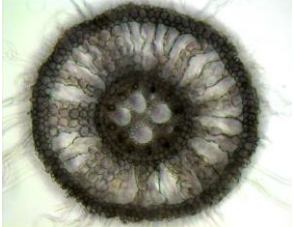 | Q12_mitte_2_10x<br>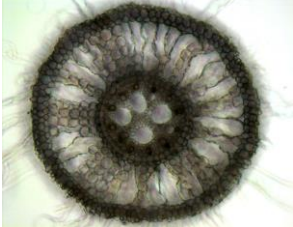  | Q12_mitte_3_10x<br>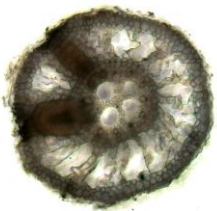 | Q13_mitte_1_10x<br>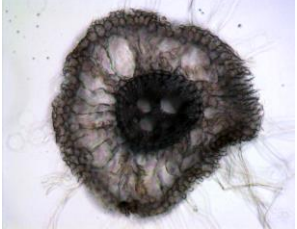 | Q13_mitte_2_10x<br>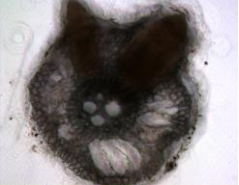 |
| Unten Q12_unten_1_10x<br>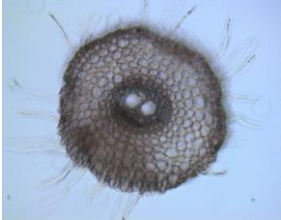 | Q12_unten_2_10x<br>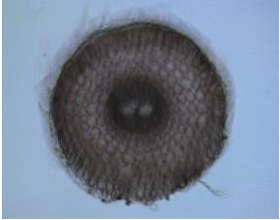 | Q11_unten_1_10x<br>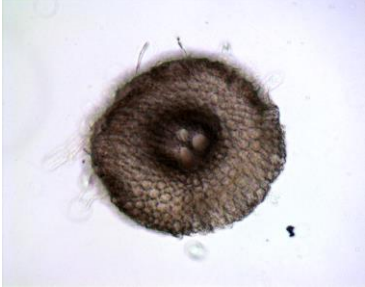 | Q12_unten_1_10x<br>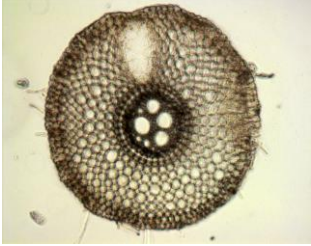 |                                                                                                        |                                                                                                        |

|                                                                                                                 |                                                                                                           |                                                                                                       |                                                                                                        |                                                                                                        |                                                                                                        |
|-----------------------------------------------------------------------------------------------------------------|-----------------------------------------------------------------------------------------------------------|-------------------------------------------------------------------------------------------------------|--------------------------------------------------------------------------------------------------------|--------------------------------------------------------------------------------------------------------|--------------------------------------------------------------------------------------------------------|
| Tsedey Control                                                                                                  |                                                                                                           |                                                                                                       |                                                                                                        |                                                                                                        |                                                                                                        |
| T5_oben_1_10x<br>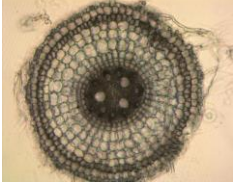               | T5_oben_2_10x<br>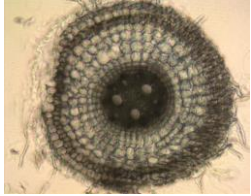        | T5_oben_3_10x<br>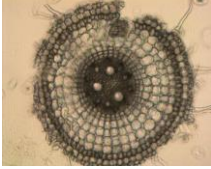   | T9_oben_1_10x<br>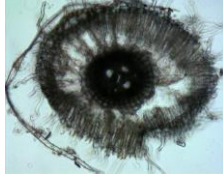   |                                                                                                        |                                                                                                        |
| Mitte T1_mitte_1_10x_150um<br>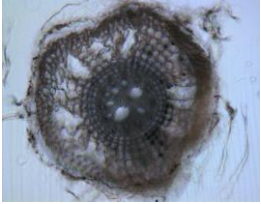  | T1_mitte_2_10x_150um<br>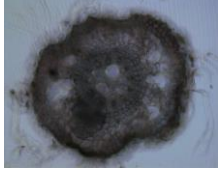 | T5_mitte_2_10x<br>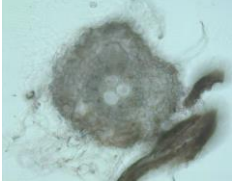  | T5_mitte_3_10x<br>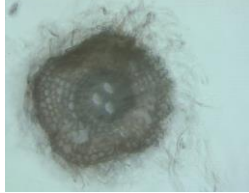  | T5_mitte_4_10x<br>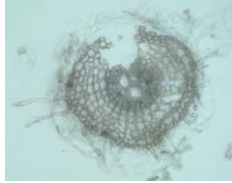  | T5_mitte_10x<br>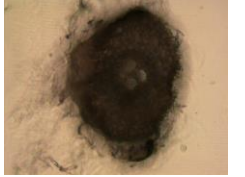    |
| T9_mitte_1_10x<br>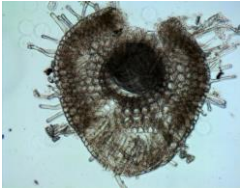              |                                                                                                           |                                                                                                       |                                                                                                        |                                                                                                        |                                                                                                        |
| Unten T1_unten_1_10x_150um<br>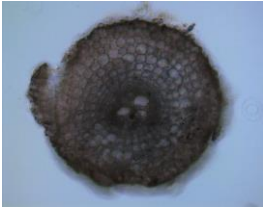 | T5_unten_1_10x<br>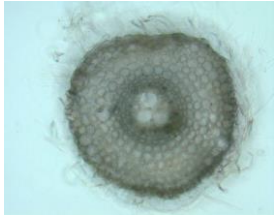      | T5_unten_3_10x<br>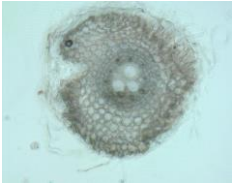 | T5_unten_4_10x<br>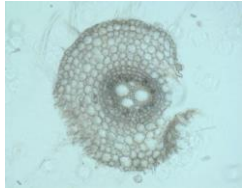 | T9_unten_1_10x<br>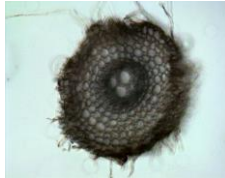 | T9_unten_2_10x<br>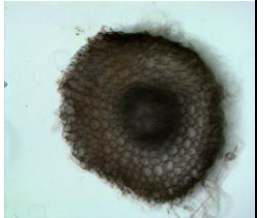 |

|                                                                                                             |                                                                                                             |                                                                                                              |                                                                                                             |                                                                                                             |                                                                                                       |
|-------------------------------------------------------------------------------------------------------------|-------------------------------------------------------------------------------------------------------------|--------------------------------------------------------------------------------------------------------------|-------------------------------------------------------------------------------------------------------------|-------------------------------------------------------------------------------------------------------------|-------------------------------------------------------------------------------------------------------|
| Tsedey Waterlogging                                                                                         |                                                                                                             |                                                                                                              |                                                                                                             |                                                                                                             |                                                                                                       |
| T13_2_oben_1_10x<br>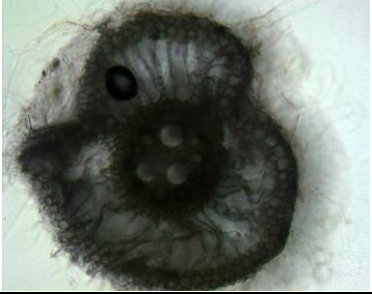        | T13_2_oben_2_10x<br>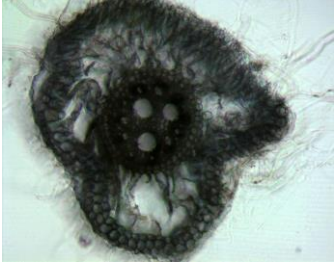       | T13_oben_1_10x<br>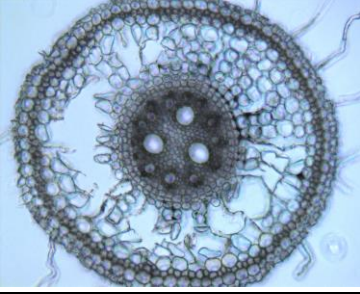         | T13_oben_2_10x_150um<br>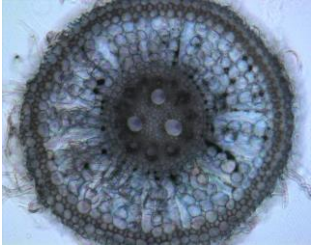 | T13_oben_3_10x_150um<br>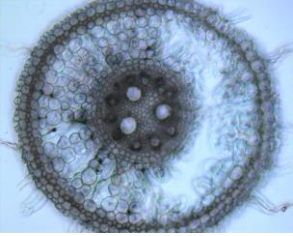 | T14_oben_1_10x<br>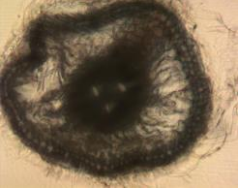 |
|                                                                                                             | T16_oben_1_10x<br>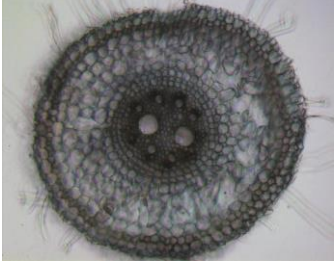         | T16_oben_2_10x<br>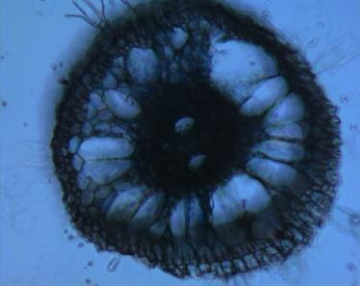         |                                                                                                             |                                                                                                             |                                                                                                       |
| T13_2_mitte_1_10x<br>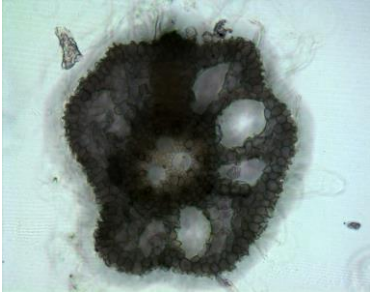      | T13_mitte_1_10x_150um<br>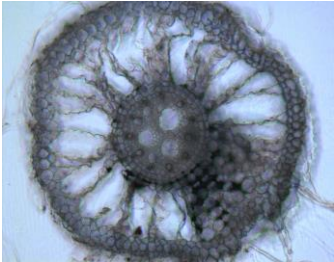 | T13_mitte_2_10x_150um<br>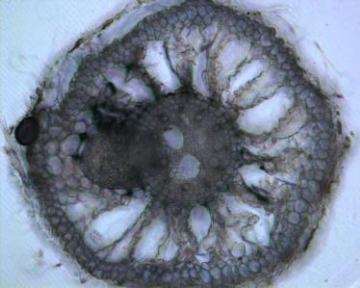 |                                                                                                             |                                                                                                             |                                                                                                       |
| T13_unten_1_10x_150um<br>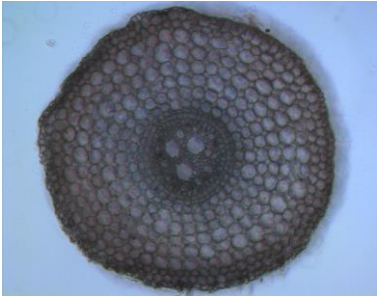 | T14_unten_1_10x<br>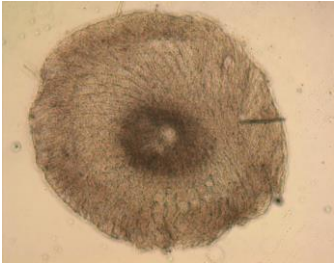      | T16_unten_1_10x<br>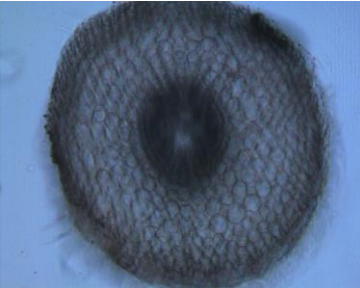      | T16_unten_2_10x<br>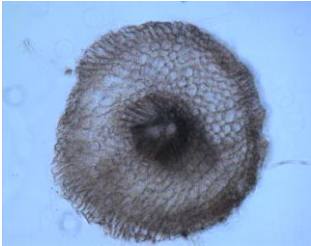    |                                                                                                             |                                                                                                       |

**Figure S5. Complete set of cross sections taken from 28-day old plants.** Cross sections of 19 day-old *Alba*, *Tsedey* and *Quncho* subjected to 9 days of waterlogging stress. All cross sections photographed are included for visualization of the variability.

| Days<br>after<br>treatm<br>ent | tip                                                                                                                    |                                                                                                                           | middle                                                                                                                     |                                                                                                                             | top                                                                                                                        |                                                                                                                            |
|--------------------------------|------------------------------------------------------------------------------------------------------------------------|---------------------------------------------------------------------------------------------------------------------------|----------------------------------------------------------------------------------------------------------------------------|-----------------------------------------------------------------------------------------------------------------------------|----------------------------------------------------------------------------------------------------------------------------|----------------------------------------------------------------------------------------------------------------------------|
|                                | control                                                                                                                | waterlog                                                                                                                  | control                                                                                                                    | waterlog                                                                                                                    | control                                                                                                                    | waterlog                                                                                                                   |
| 2<br>20x                       | Quncho_58_tip_1502_150um_20x<br>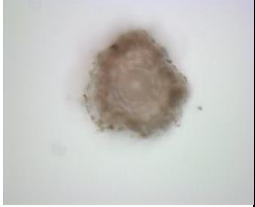      | Quncho_8_tip_1502_150um_20x<br>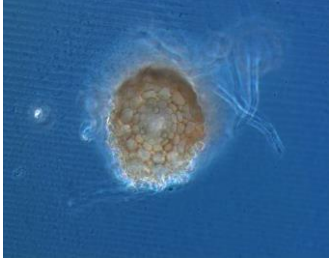          |                                                                                                                            |                                                                                                                             | Quncho_58_up_1502_150um_10x<br>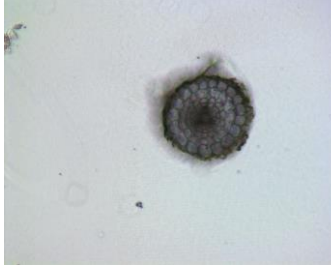         | Quncho_8_up_1502_150um_20x<br>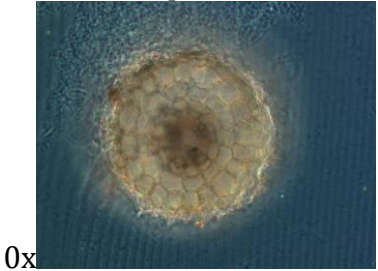          |
| 4<br>20x                       | Quncho_66_2nd tip_1702_150um_20x<br>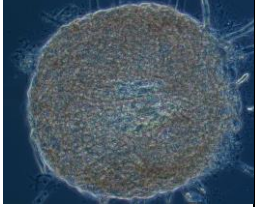  | Quncho_29_2nd tip_1702_150um_20x.tif<br>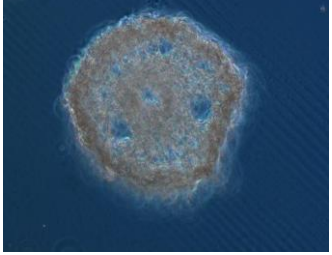 |                                                                                                                            |                                                                                                                             | Quncho_66_2nd up_1702_150um_20x.tif<br>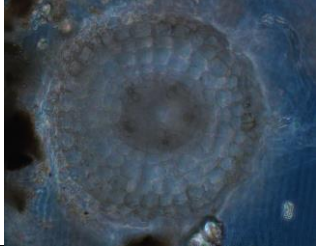 | Quncho_29_2nd up_1702_150um_20x.tif<br>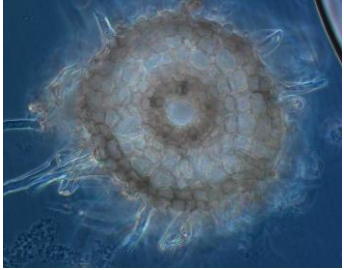 |
| 7<br>20x                       |                                                                                                                        | Quncho_32_2nd tip_200um_20x<br>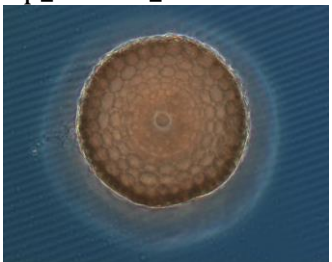         | Quncho_49_2nd middle_150um_20x.tif<br>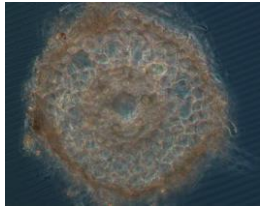 | Quncho_32_2nd middle_150um_20x.tif<br>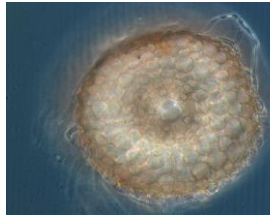 | Quncho_49_2nd up_150um_20x<br>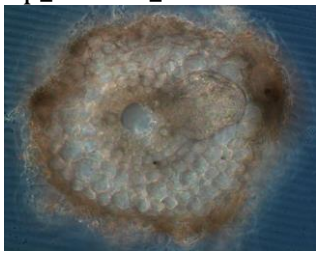         | Quncho_32_2nd up_150um_20x<br>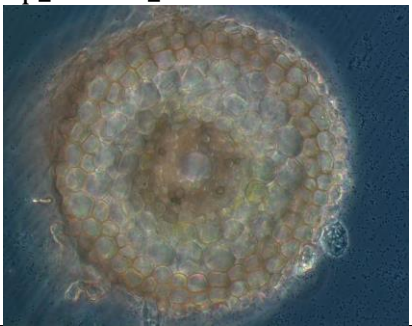         |
| 9<br>20x                       | Quncho_45_2nd tip_150um_20x.tif<br>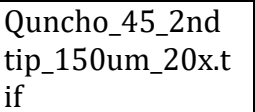 |                                                                                                                           | Quncho_45_2nd middle_100um_20x.tif<br>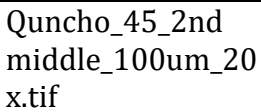 | Quncho_19_2nd middle_150um_20x<br>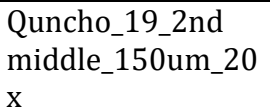     |                                                                                                                            |                                                                                                                            |

|    |                                                                                                                         |                                                                                                                         |                                                                                                                             |                                                                                                                              |                                                                                                                           |                                                                                                                           |
|----|-------------------------------------------------------------------------------------------------------------------------|-------------------------------------------------------------------------------------------------------------------------|-----------------------------------------------------------------------------------------------------------------------------|------------------------------------------------------------------------------------------------------------------------------|---------------------------------------------------------------------------------------------------------------------------|---------------------------------------------------------------------------------------------------------------------------|
|    | 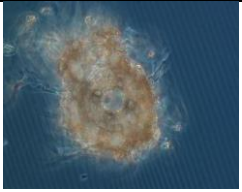                                        |                                                                                                                         | 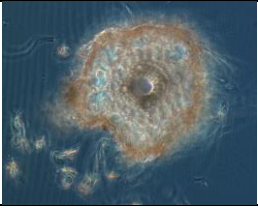                                           | 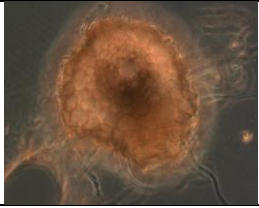                                           |                                                                                                                           |                                                                                                                           |
| 16 | <p>Quncho_42_<br/>top_150um_10x_1</p> 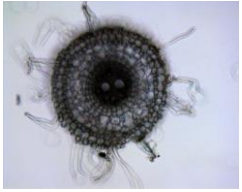 | <p>Quncho_20_<br/>tip_150um_20x_2</p> 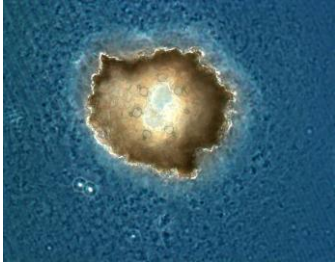 | <p>Quncho_42_<br/>middle_150um_10x_2</p> 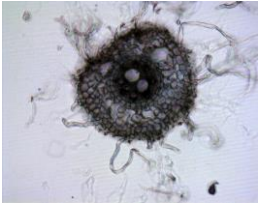 | <p>Quncho_20_<br/>middle_150um_20x_2</p> 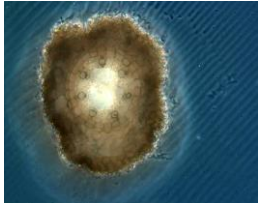 | <p>Quncho_42_<br/>top_150um_10x_1</p> 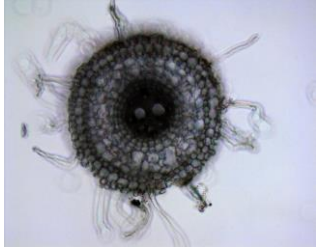 | <p>Quncho_20_<br/>top_200um_20x_2</p> 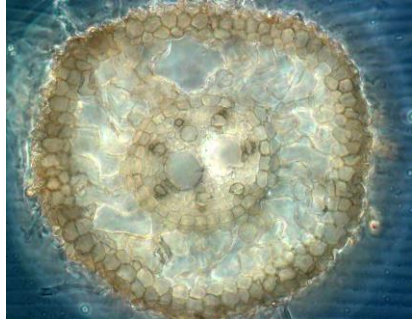 |
| 24 | <p>Q34_unten_2_10x</p> 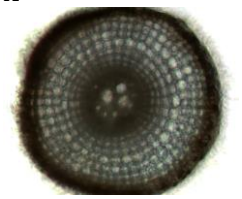                | <p>Q13_unten_1_10x</p> 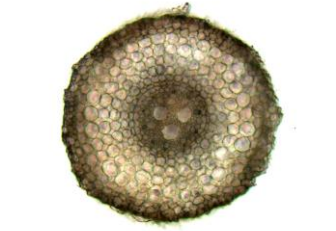                | <p>Q34_mitte_3_10x</p> 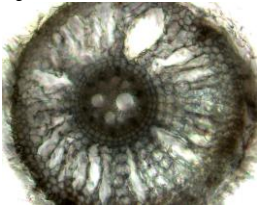                   | <p>Q13_mitte_1_10x</p> 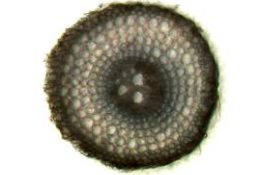                   | <p>Q34_oben_1_10x</p> 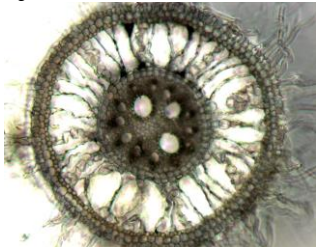                 | <p>Q13_oben_1_10x</p> 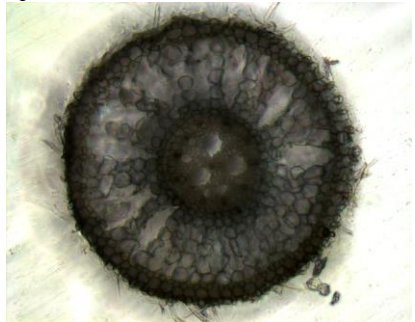                |

| Days after treatment | tip                                                                                                               |                                                                                                                                    |                                                                                                                      |                                                                                                                      | top                                                                                                                |                                                                                                                                 |
|----------------------|-------------------------------------------------------------------------------------------------------------------|------------------------------------------------------------------------------------------------------------------------------------|----------------------------------------------------------------------------------------------------------------------|----------------------------------------------------------------------------------------------------------------------|--------------------------------------------------------------------------------------------------------------------|---------------------------------------------------------------------------------------------------------------------------------|
|                      | control                                                                                                           | waterlog                                                                                                                           |                                                                                                                      |                                                                                                                      | control                                                                                                            | waterlog                                                                                                                        |
| 2 20x                | Tsedey_58_tip_1502_150um_20x<br>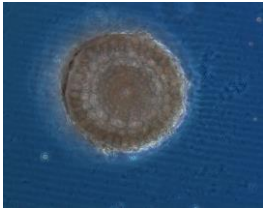 | Tsedey_8_tip_1502_150um_20x<br>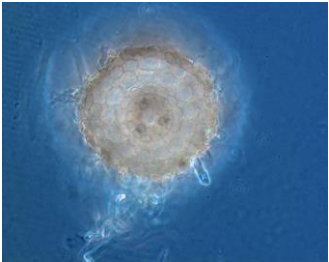                   |                                                                                                                      |                                                                                                                      | Tsedey_58_up_1502_200um_20x<br>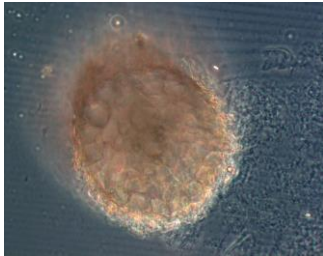 | Tsedey_8_up_1502_150um_20x<br>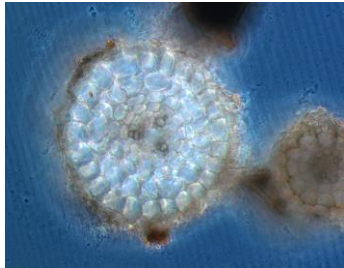               |
| 4 20x                | Tsedey_66_tip_1702_150um_20x<br>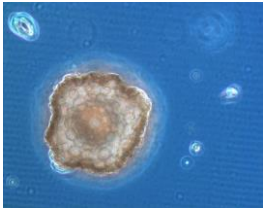 | Tsedey_29_2nd root middle_1702_150um_20x.tif<br>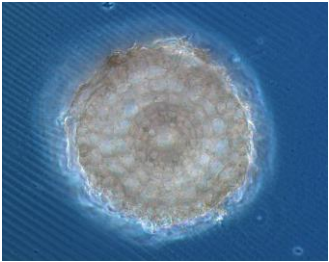 |                                                                                                                      |                                                                                                                      | Tsedey_66_up_1702_150um_20x<br>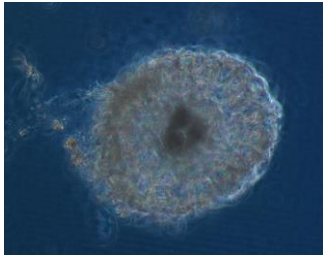 | Tsedey_29_1st root up_1702_150um_20x.tif<br>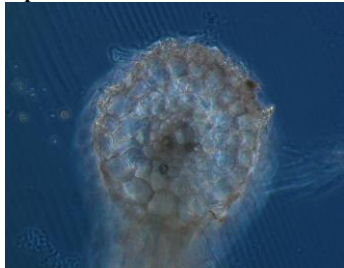 |
| 7                    | Tsedey_49_2nd tip_150_20x<br>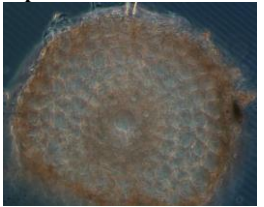  |                                                                                                                                    | Tsedey_49_2nd middle_150_20x<br>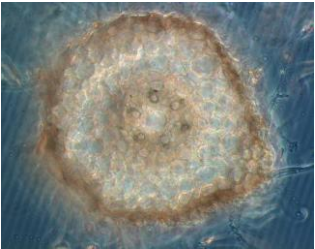 | Tsedey_32_2nd middle_no_20x<br>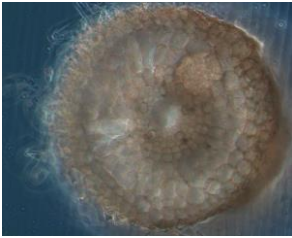 | Tsedey_49_2nd up_150_20x<br>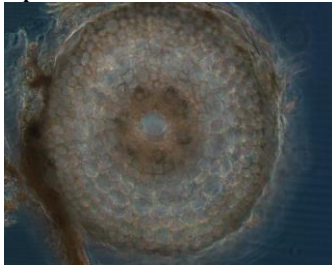  | Tsedey_32_2nd up_150_20x<br>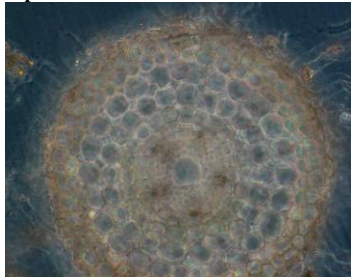               |
| 9 20x                | Tsedey_45_2nd tip_150um_20x_1                                                                                     | Tsedey_19_2nd tip_150um_20x_2                                                                                                      |                                                                                                                      | Tsedey_19_2nd middle_150um_20x_2                                                                                     | Tsedey_45_2nd top_200um_20x_2                                                                                      | Tsedey_19_2nd top_200um_20x_1                                                                                                   |

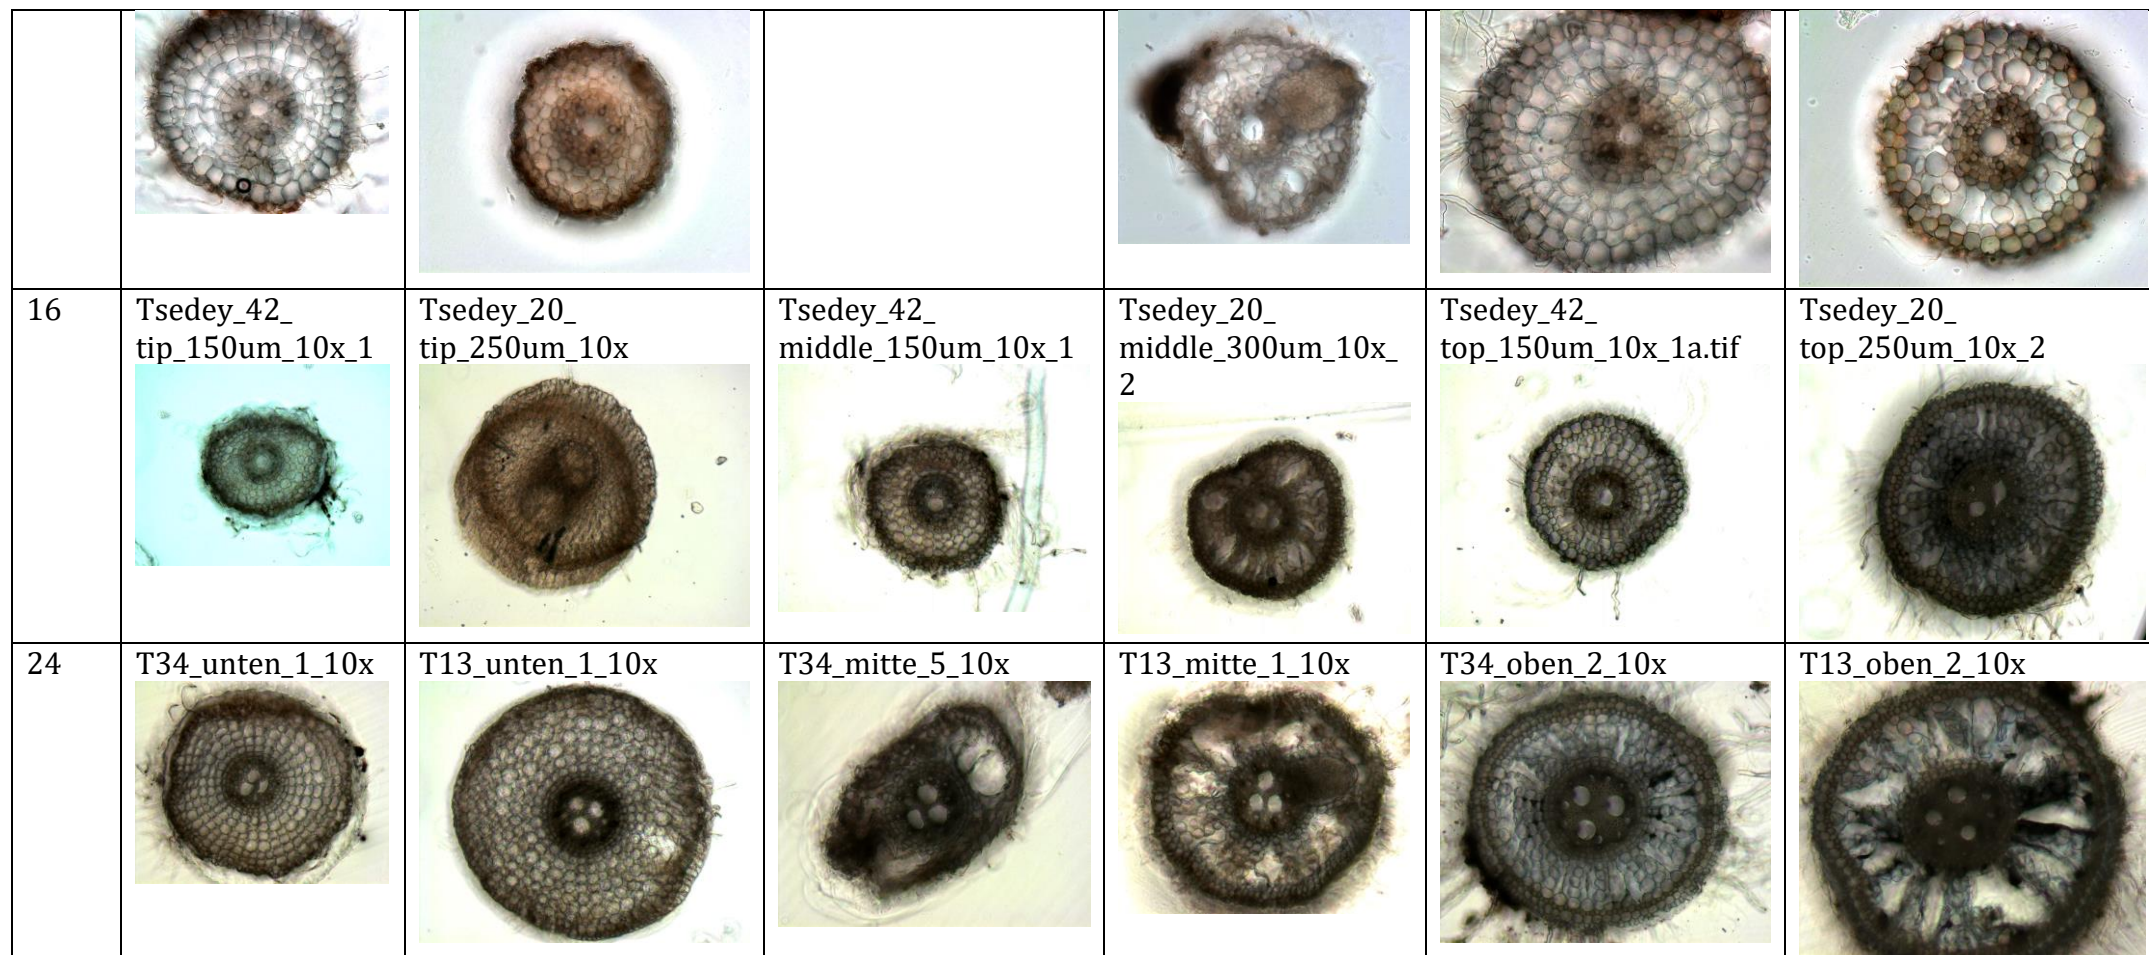

**Figure S6. Complete set of cross sections taken at various time points after waterlogging.** Cross sections of 4 day-old *Tsedey* and *Quncho* after 2, 4, 7, 9, 16 and 24 days after waterlogging.

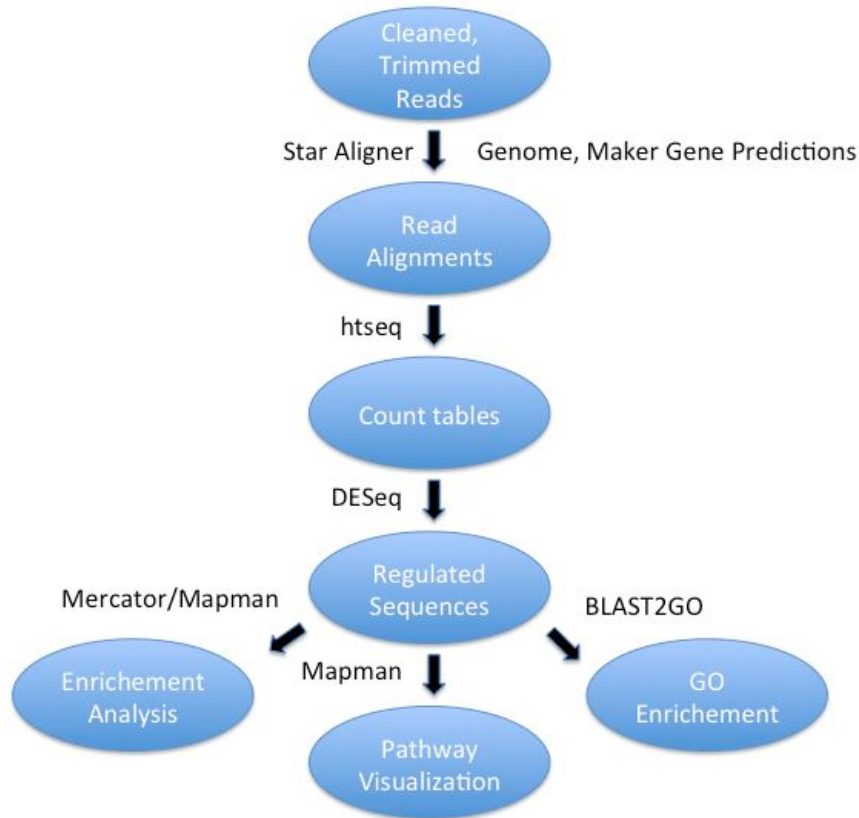

**Figure S7. Pipeline for RNA-Seq Analysis.** Raw reads were obtained for 2 conditions, normal watering (control) and waterlogging. The reads were cleaned, trimmed and mapped with the Star Aligner onto the *tef* genome. Count tables were generated with htseq, which was supplied with the genome, the predicted gene locations and the read alignments. The count tables were used as input to DESeq to find the differentially regulated genes. Pathways and functional categories enriched in regulated sequences were found using MapMan. Enriched GO categories were discovered using Blast2GO.

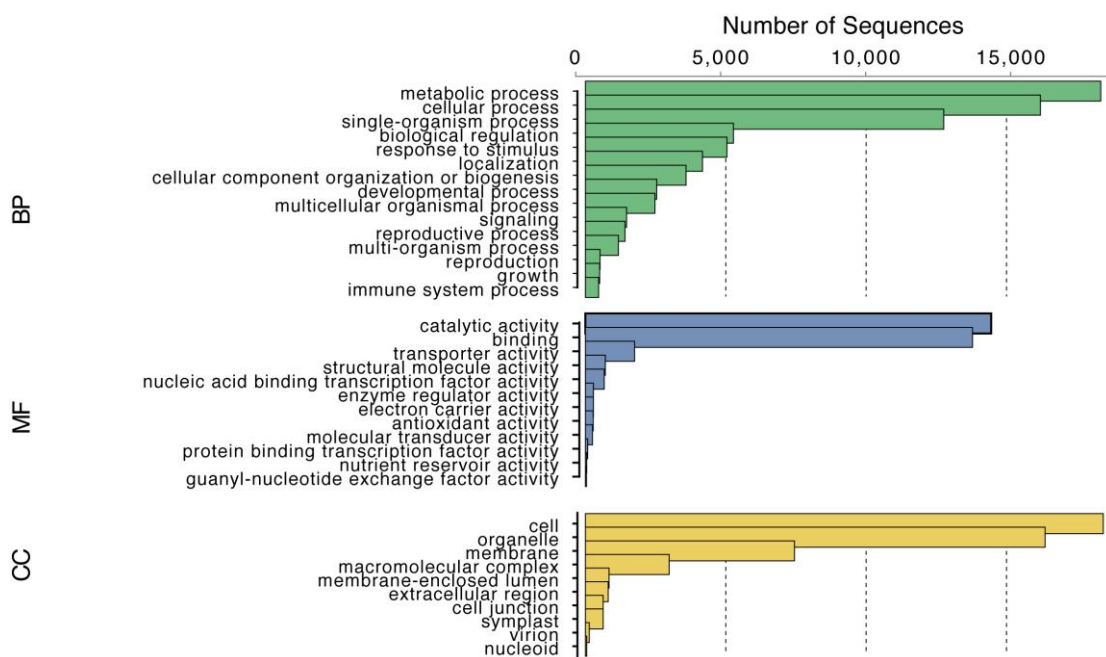

**Figure S8. Distribution of GO Ontologies in the background set.** The top functional categories of the GO Ontologies are shown for all proteins in the background set, included are the biological process (BP), molecular function (MF) and cellular component (CC).

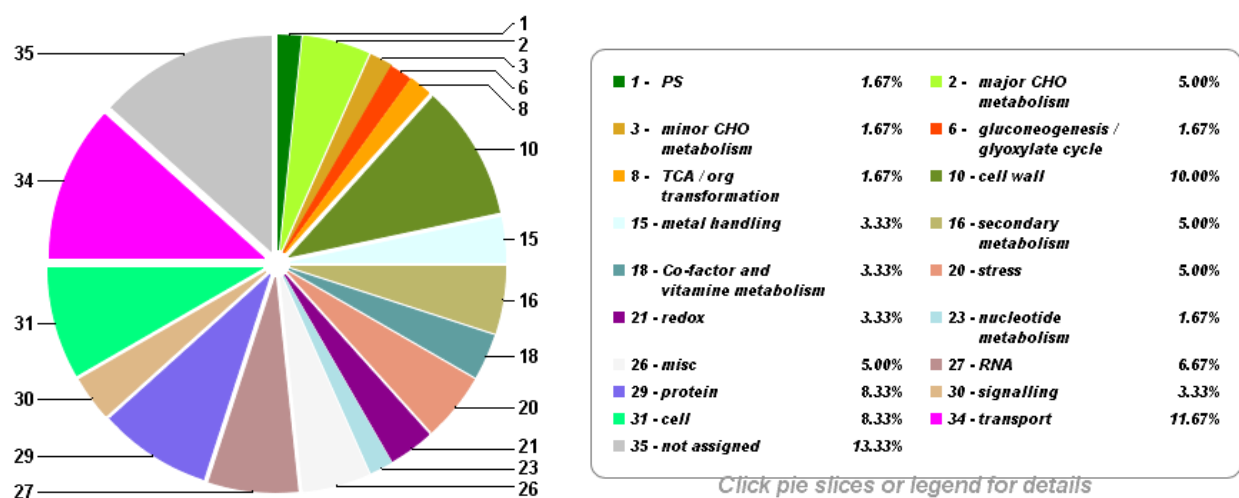

**Figure S9. Distribution of protein functional categories in the background set as determined by Mercator.** The Functional categories of transport (11.67%), cell wall (10.00%), CHO metabolism, major and minor (6.67%) and various other metabolisms are highly represented in the background set. PS- photosynthesis, redox- oxidation reduction, OPP- oxidative pentose phosphate, minor CHO metabolism- minor carbohydrate metabolism, misc- miscellaneous. Numbers represent the Mercator protein category while the percentages represent the percentage of total proteins in each category.

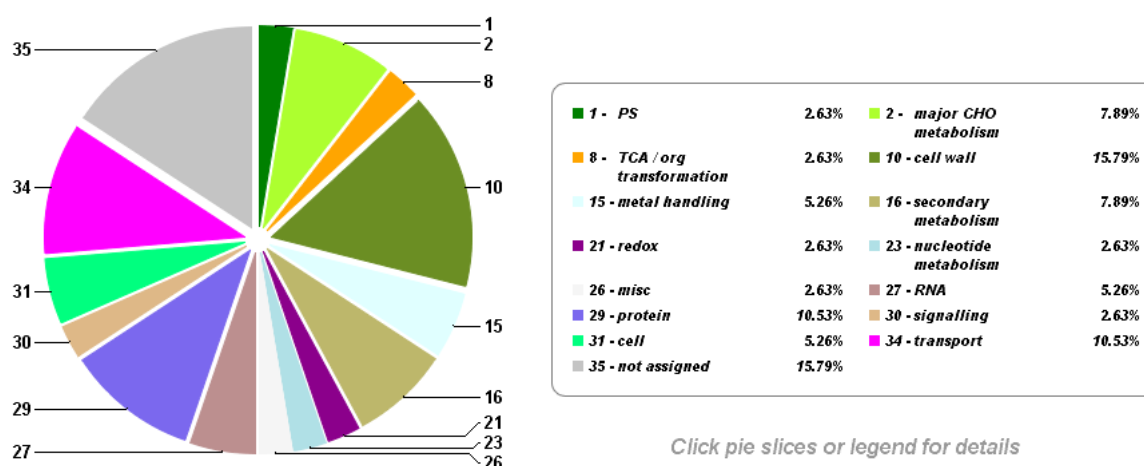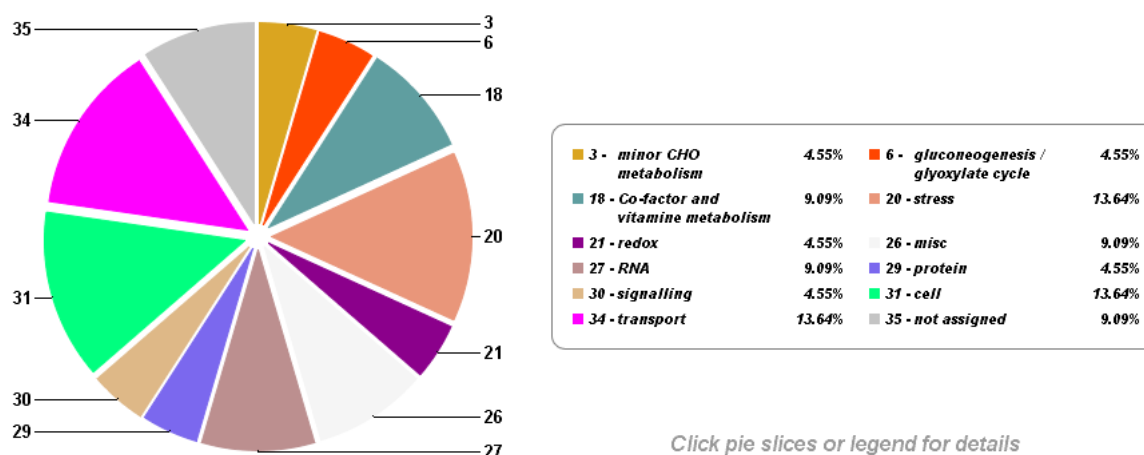

**Figure S10. Differentially regulated *tef* proteins under waterlogging.** Distribution of functional categories of (A) upregulated and (B) downregulated proteins as determined by Mercator. PS- photosynthesis, redox- oxidation reduction, OPP- oxidative pentose phosphate, minor CHO metabolism- minor carbohydrate metabolism, misc- miscellaneous. The Mercator protein category and the percentage of total proteins in that category are reported.

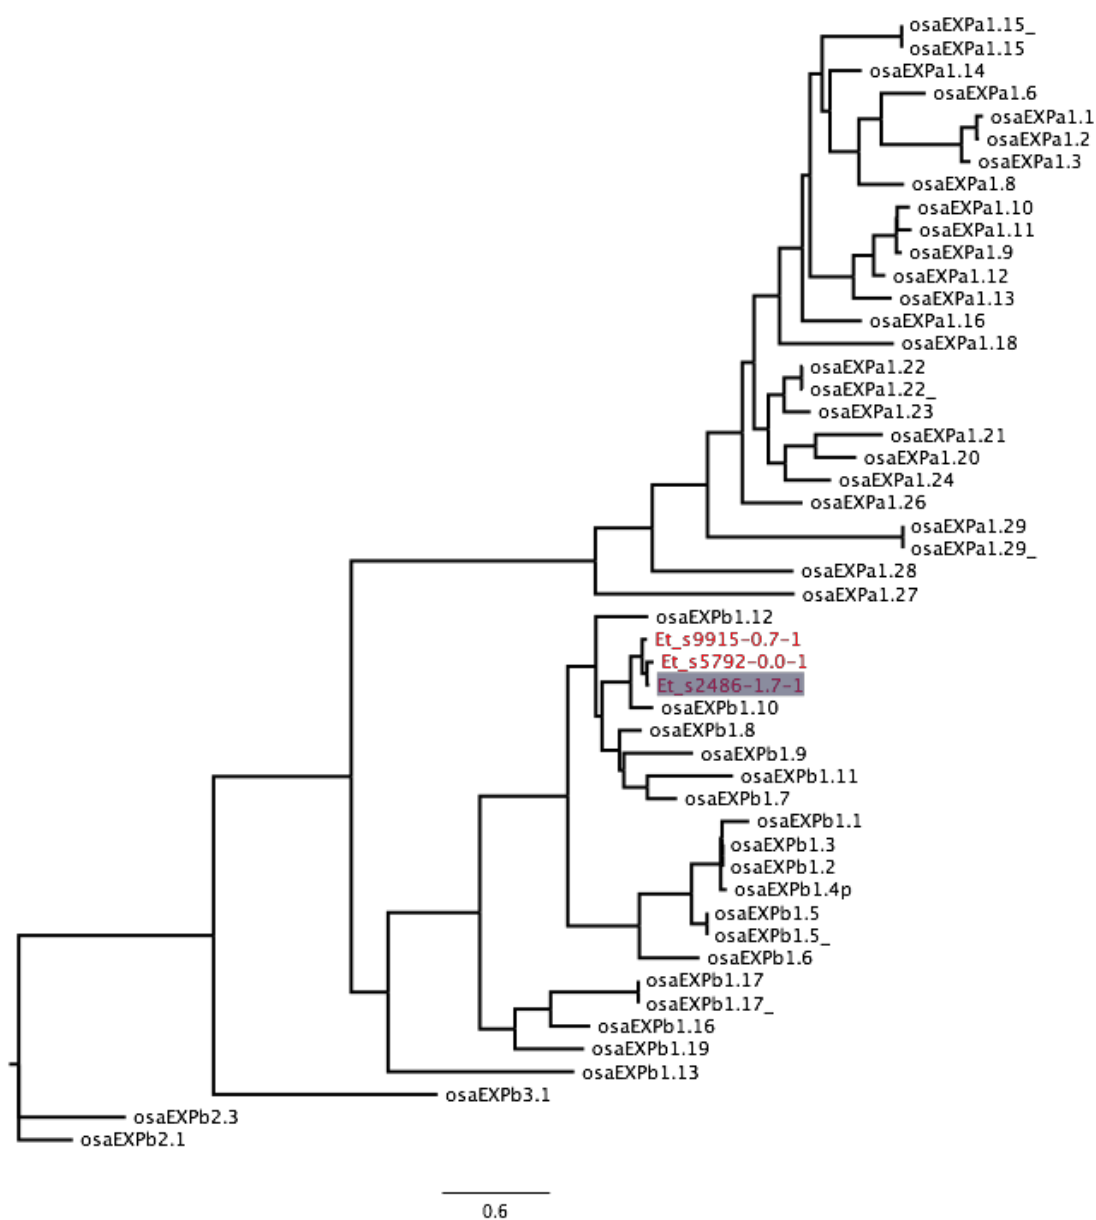

**Figure S11. Phylogenetic tree of expansins.** The *tef* expansin sequences (red) are upregulated under waterlogging and are of the type  $\beta 1$ . They are most closely related to the rice sequence EXP $\beta$ 1.10 and form a clade with EXP $\beta$ 1.7, EXP $\beta$ 1.8, EXP $\beta$ 1.9 and EXP $\beta$ 1.11 using the nomenclature described in the text.

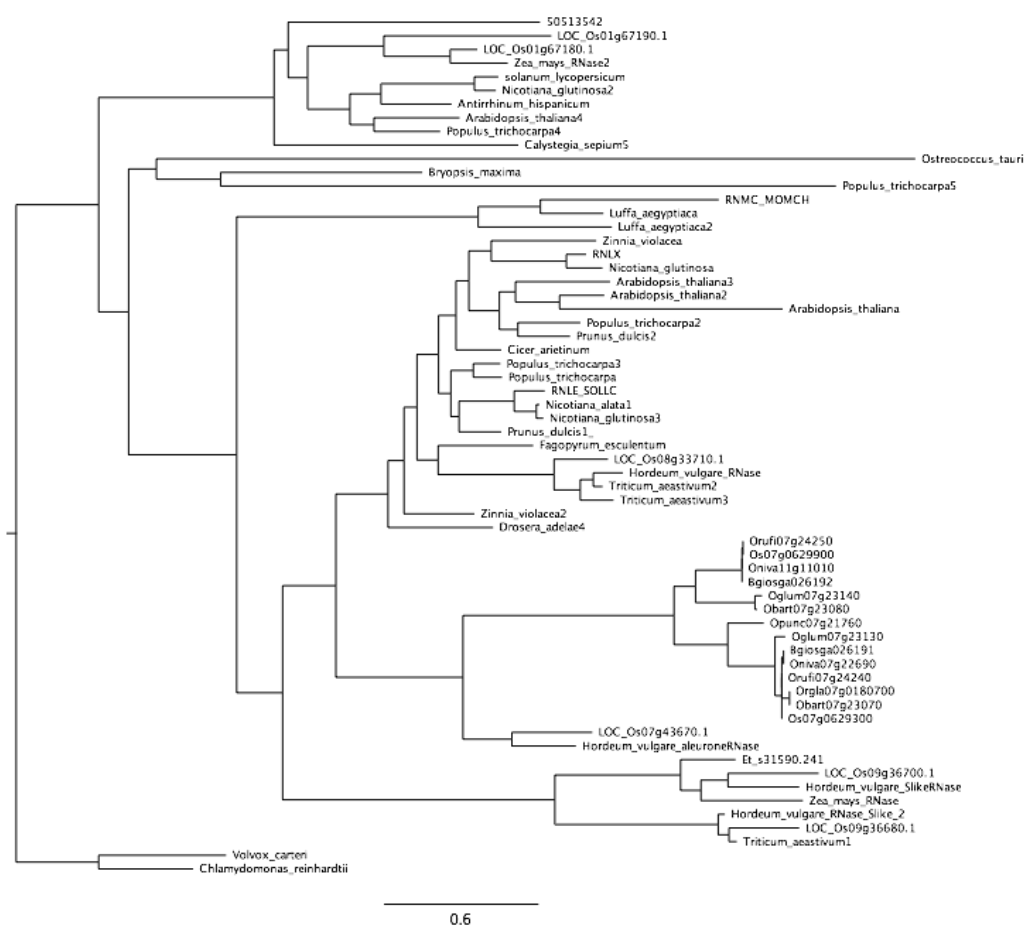

**Figure S12. Phylogenetic tree of ribonuclease.** The *tef* ribonuclease sequence Et\_s3159-0.24 is downregulated under waterlogging stress and clusters with the monocot-specific Class I S-like clade. This clade includes proteins that have lost their ribonuclease activity but are expressed.

## Supplementary Tables

**Table S1.** All data concerning shoot length, shoot dry weight, root length, root dry length, and number of leaves of *Quncho* subjected to early waterlogging. (**Excel file**)

**Table S2.** All data concerning shoot length, shoot dry weight, root length, root dry length, and number of leaves of *Tsedey* subjected to early waterlogging. (**Excel file**)

**Table S3.** Number of Adventitious Roots of *Alba*, *Quncho* and *Tsedey* after 9 days of waterlogging at the tillering stage.

| Parameter                                    | <i>Alba</i> |              |                     | <i>Quncho</i> |              |                     | <i>Tsedey</i> |              |                     |
|----------------------------------------------|-------------|--------------|---------------------|---------------|--------------|---------------------|---------------|--------------|---------------------|
|                                              | Contro<br>l | Waterlo<br>g | % of<br>contro<br>l | Contro<br>l   | Waterlo<br>g | % of<br>contro<br>l | Contro<br>l   | Waterlo<br>g | % of<br>contro<br>l |
| Number of adventitious roots (observation 1) | 3.2 ± 1.1   | 3.5 ± 0.8    | <b>109</b>          | 2.9 ± 1.1     | 3.7 ± 0.8    | <b>128</b>          | 3.4 ± 0.5     | 3.9 ± 1.0    | <b>114</b>          |
| Number of adventitious roots (observation 2) | 2.8 ± 0.8   | 4.5 ± 0.8    | <b>160*</b>         | 2.9 ± 0.7     | 4.3 ± 1.0    | <b>148*</b>         | 1.9 ± 1.2     | 6.4 ± 1.0    | <b>336*</b>         |

Nineteen day-old plants were grown in soil with either normal watering or with water maintained at 1 cm below the soil surface. All values for numbers of roots are means (n=10 or 11) ± SD. Means marked with an asterisk are significantly different from each other (Mann-Whitney: \*p≤0.05).

**Table S4.** Blast2GO annotations of predicted genes in the genome of *Eragrostis tef* (included as a separate text file). This is the full set of annotations of the genes predicted by Maker by the Tef Improvement Project. (**Excel file**)

**Table S5.** Genes differentially regulated when subjected to waterlogging stress, their counts and annotations. (**Excel file**)

**Table S6.** Cq values from the qPCR validation of the RNASeq expression values. (**Excel file**)
